# Supplementary material for: New nickel(ii) Schiff base complexes as potential tools against SARS-CoV-2 Omicron target proteins: an in silico approach
Source: Royal Society of Chemistry journal article supplement (doi:10.1039/d2nj05136b), 2023-01-01
Supplement: d2nj05136b1.pdf [file d2nj05136b1.pdf]

ARTICLE

**New nickel(II) Schiff base complexes as potential tool against SARS-CoV-2 Omicron target proteins: An *in-silico* approach**

Sunil Kumar<sup>a</sup>, Mukesh Choudhary<sup>a\*</sup>

---

<sup>a</sup> Department of Chemistry, National Institute of Technology Patna, Patna-800005 (Bihar) India.

<sup>a.\*</sup> Corresponding author: [mukesh@nitp.ac.in](mailto:mukesh@nitp.ac.in)

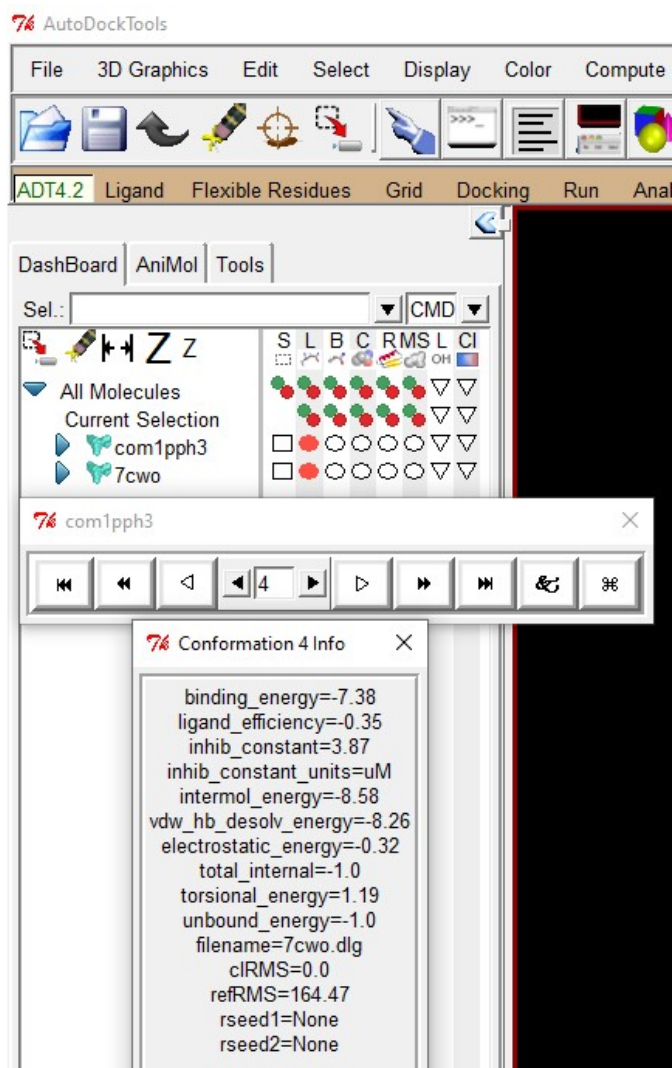

Figure S1 (A). Screenshot of Autodock outputs for Ni(I) complex  $[\text{Ni}(\text{L}^1)](\text{PPh}_3)\text{DMF}(1)$  with SARS-CoV-2 Spike protein (PDB ID: 7CWO).

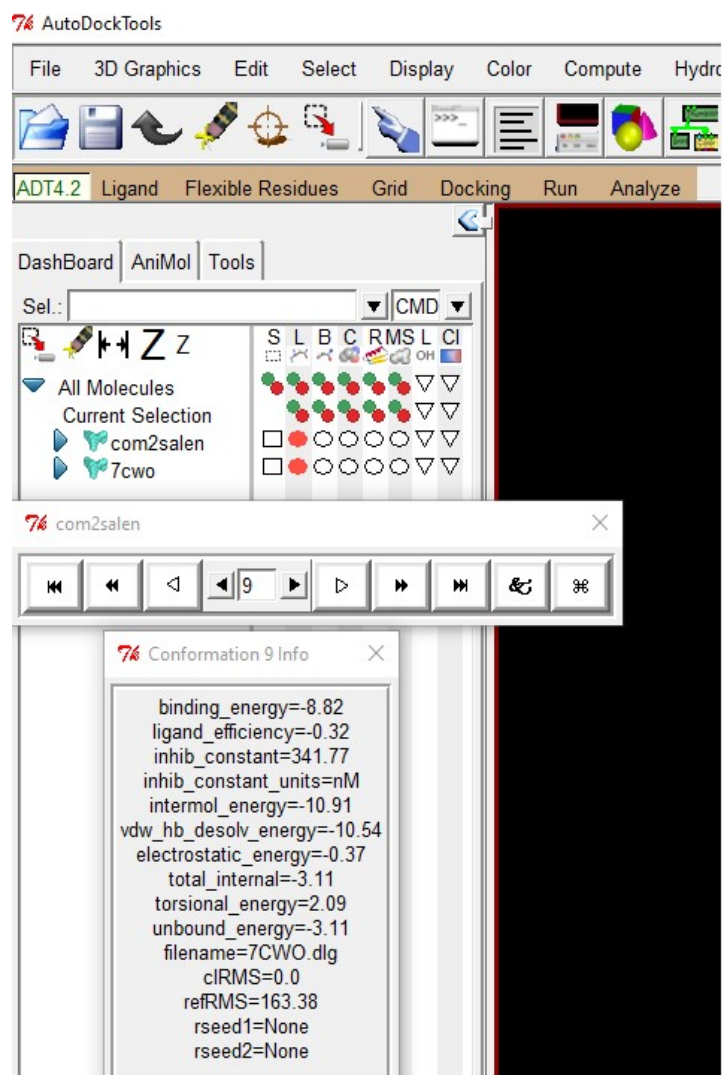

Figure S1 (B). Screenshot of Autodock outputs for Ni(II) complex  $[\text{Ni}(\text{L}^2)](2)$  with SARS-CoV-2 Spike protein (PDB ID: 7CWO).

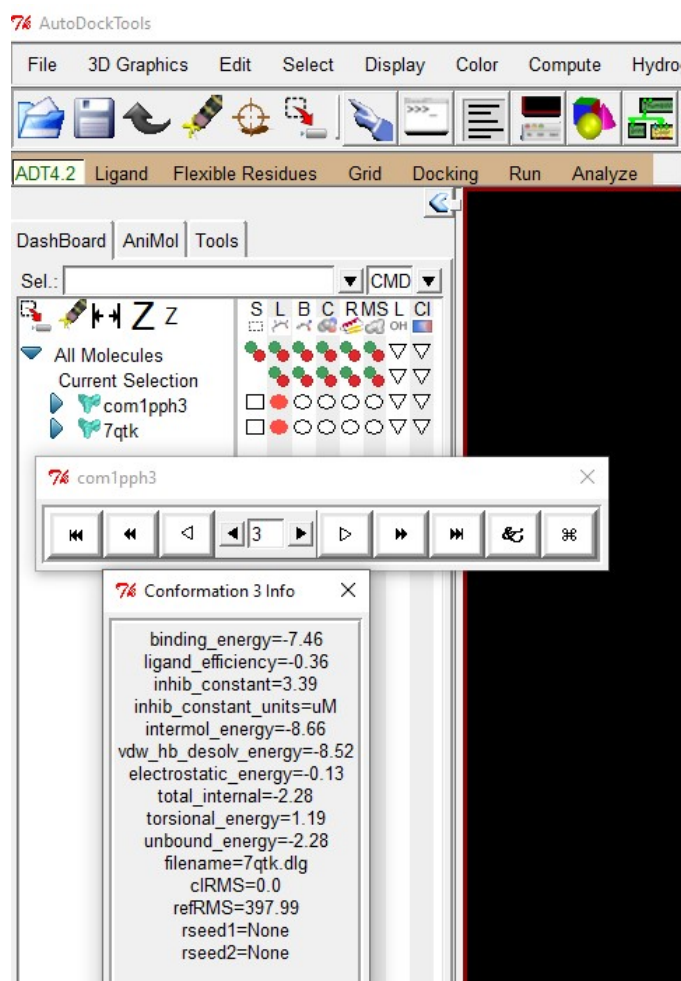

Figure S1(C). Screenshot of Autodock outputs for Ni(II) complex  $[\text{Ni}(\text{L}^1)](\text{PPh}_3)_3$ DMF(1) with Omicron S protein (PDB ID: 7QTK).

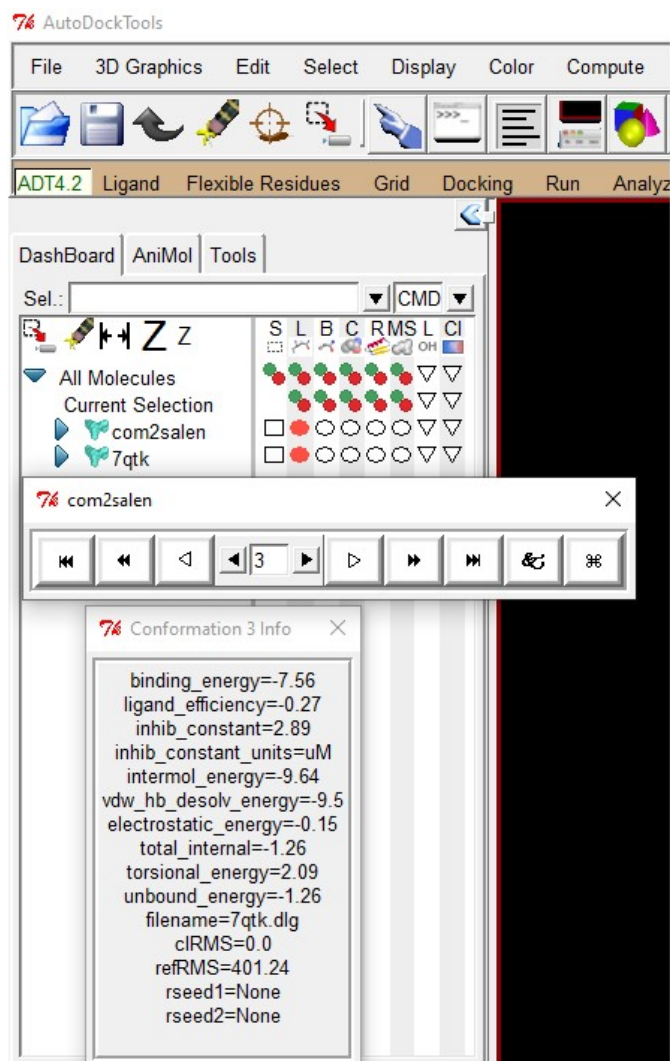

Figure S1 (D). Screenshot of Autodock outputs for Ni(II) complex  $[\text{Ni}(\text{L}^2)]_2$  with Omicron S protein (PDB ID: 7QTK).

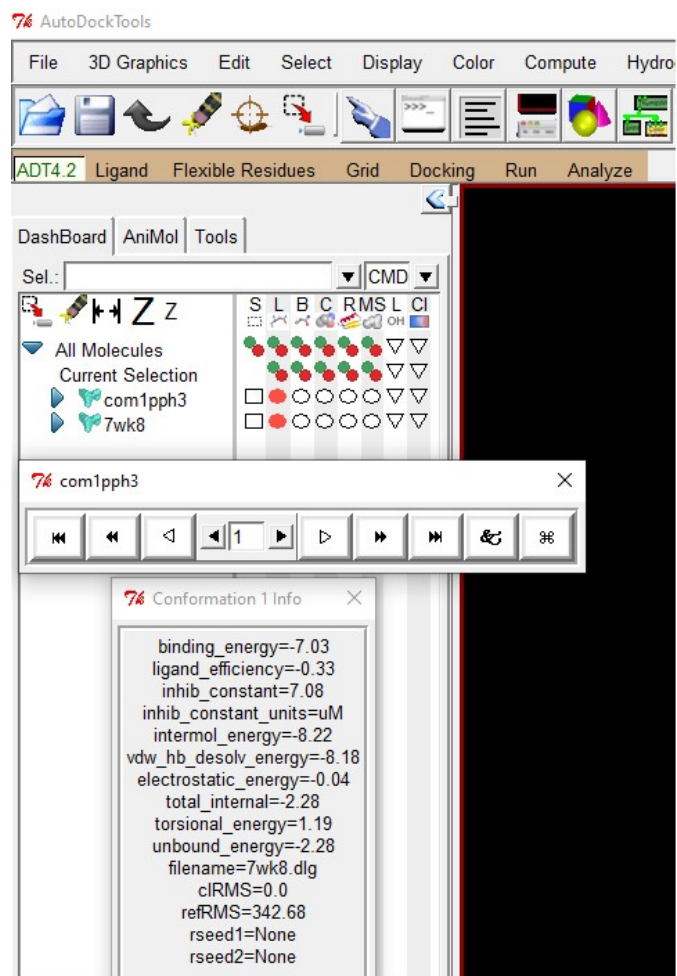

Figure S1 (E). Screenshot of Autodock outputs for Ni(II) complex  $[\text{Ni}(\text{L}^1)](\text{PPh}_3)\text{DMF}(\mathbf{1})$  with Omicron S protein (PDB ID: 7WK8).

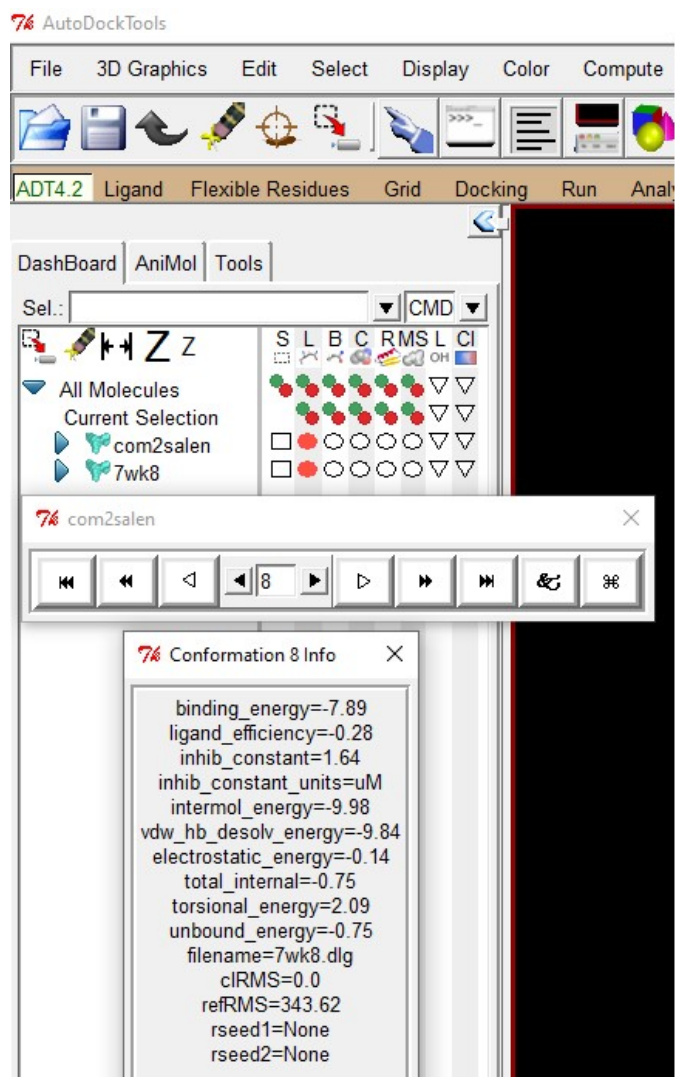

Figure S1 (F). Screenshot of Autodock outputs for Ni(II) complex  $[\text{Ni}(\text{L}^2)](\mathbf{2})$  with Omicron S protein (PDB ID: 7WK8).

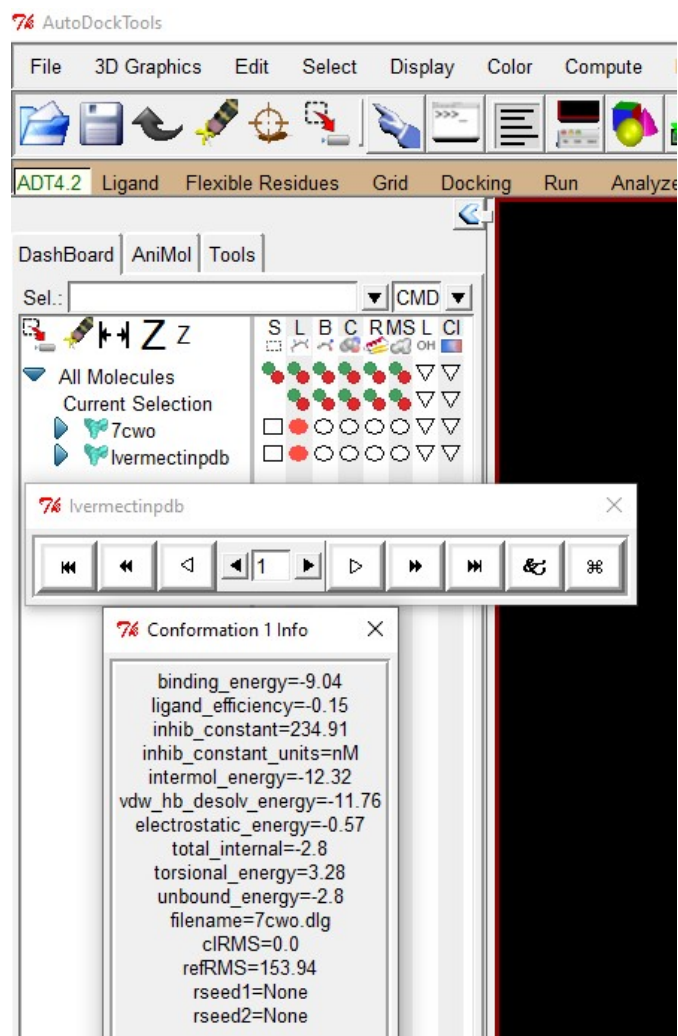

Figure S1 (G). Screenshot of Autodock outputs for ivermectin (IVM) with SARS-CoV-2 spike protein (PDB ID: 7CWO).

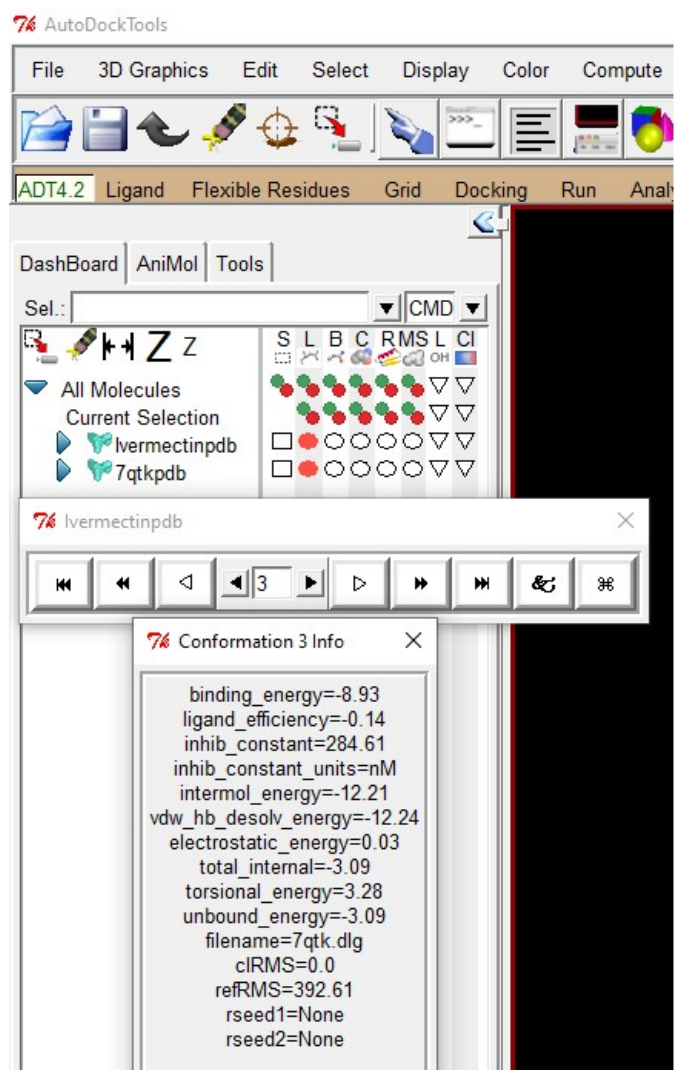

Figure S1 (H). Screenshot of Autodock outputs for ivermectin (IVM) with Omicron S protein (PDB ID: 7QTK).

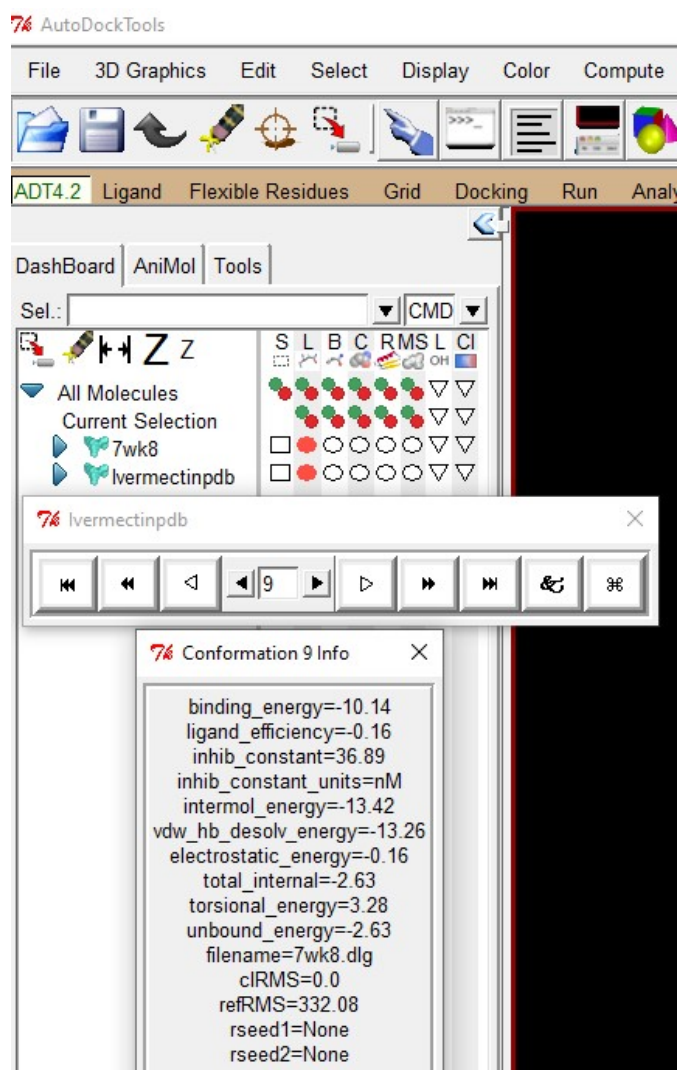

Figure S1 (I). Screenshot of Autodock outputs for ivermectin (IVM) with Omicron S protein (PDB ID: 7WK8).

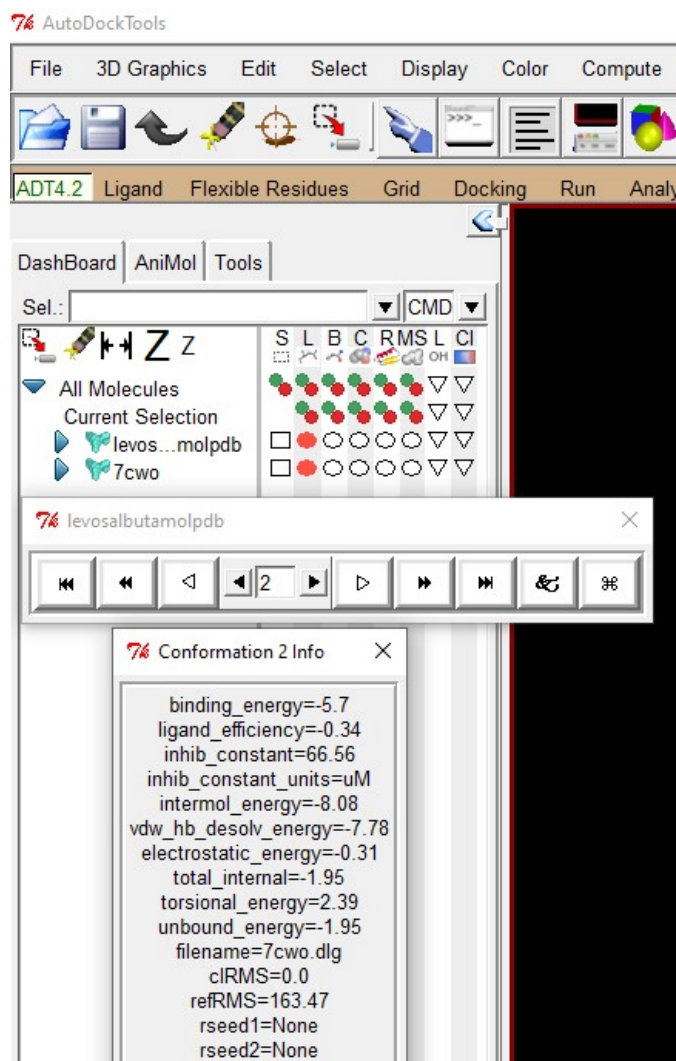

Figure S1 (J). Screenshot of Autodock outputs for levosalbutamol (LVM) with SARS-CoV-2 spike protein (PDB ID: 7CWO).

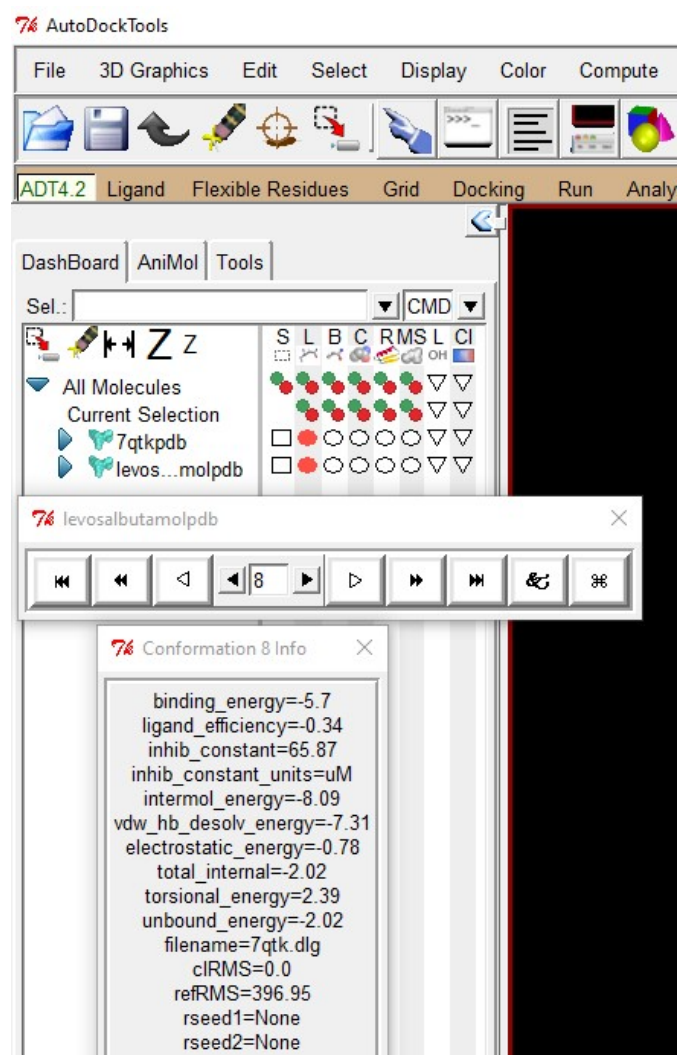

Figure S1 (K). Screenshot of Autodock outputs for levosalbutamol (LVM) with Omicron S protein (PDB ID: 7QTK).

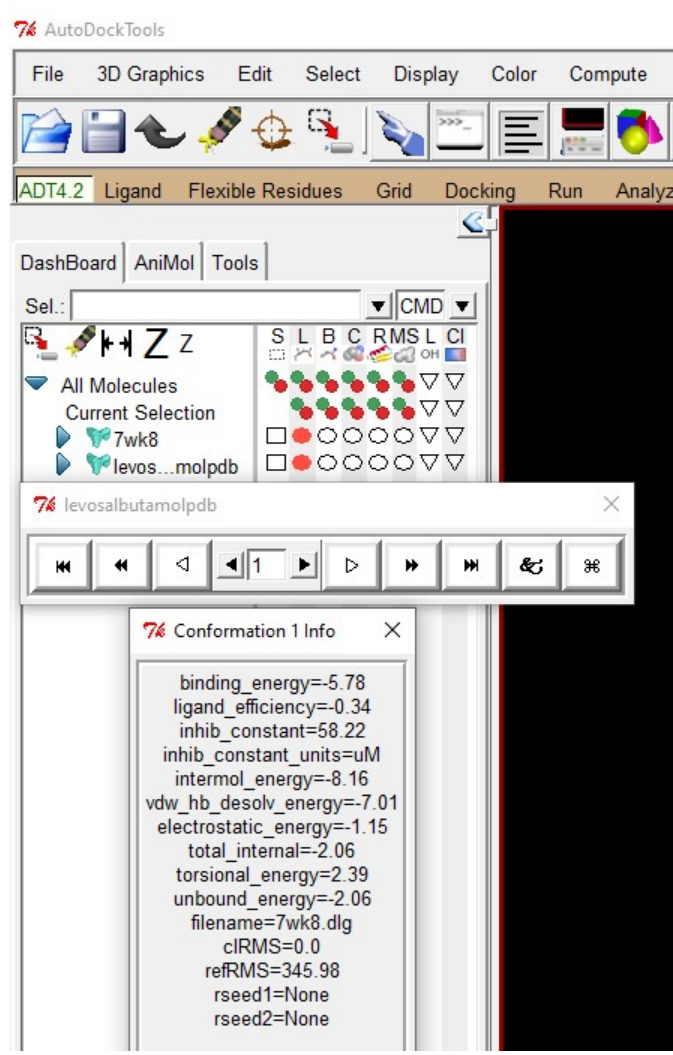

Figure S1 (L). Screenshot of Autodock outputs for levosalbutamol (LVM) with Omicron S protein (PDB ID: 7WK8).
