# Supplementary material for: New nickel(ii) Schiff base complexes as potential tools against SARS-CoV-2 Omicron target proteins: an in silico approach
Source: Royal Society of Chemistry journal article supplement (doi:10.1039/d2nj05136b), 2023-01-01
Supplement: d2nj05136b2.pdf [file d2nj05136b2.pdf]

ARTICLE

**New nickel(II) Schiff base complexes as potential tool against SARS-CoV-2 Omicron target proteins: An *in-silico* approach**

Sunil Kumar<sup>a</sup>, Mukesh Choudhary<sup>a\*</sup>

---

<sup>a</sup> Department of Chemistry, National Institute of Technology Patna, Patna-800005 (Bihar) India.

<sup>a.\*</sup> Corresponding author: [mukesh@nitp.ac.in](mailto:mukesh@nitp.ac.in)

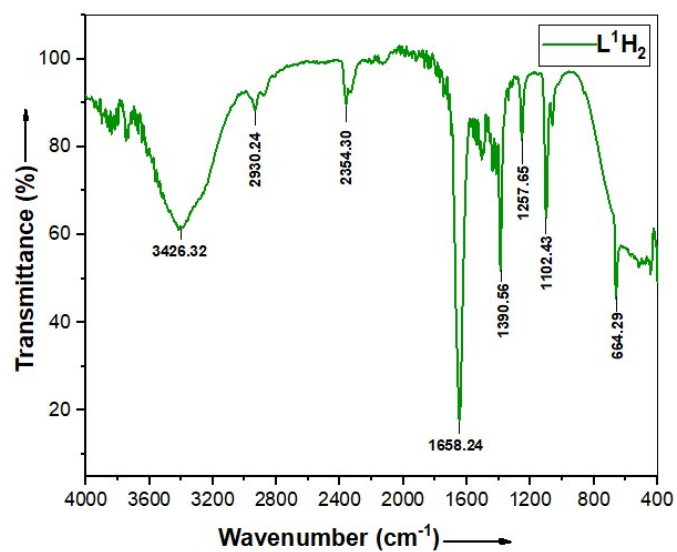Figure S1. FT-IR spectra of Schiff base ligand  $L^1H_2$ .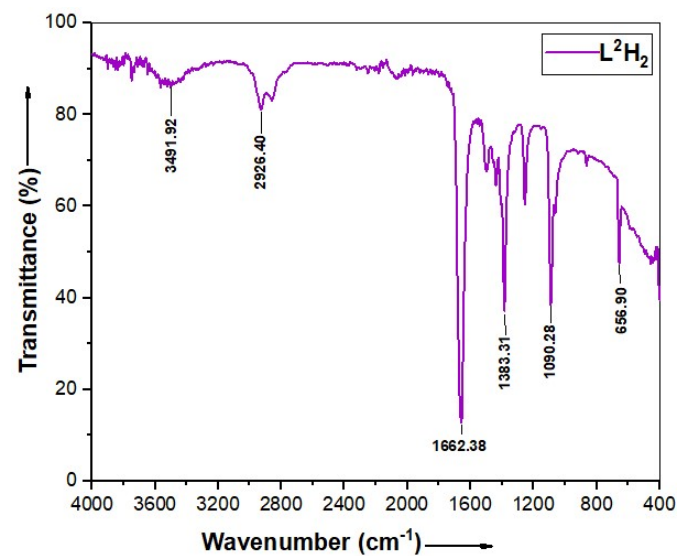Figure S2. FT-IR spectra of Schiff base ligand  $L^2H_2$ .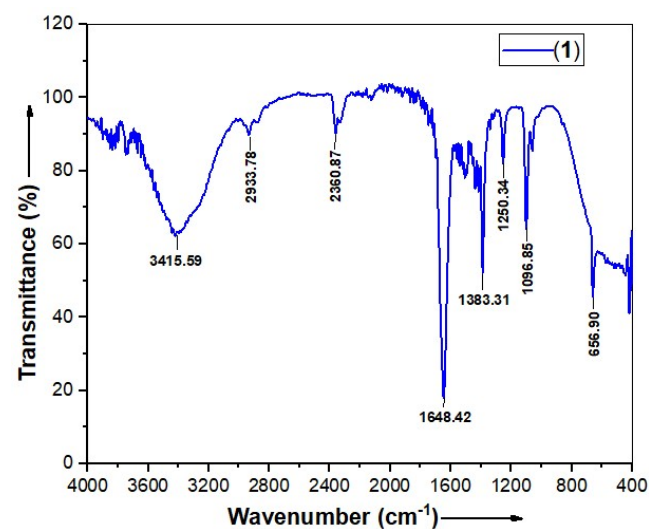Figure S3. FT-IR spectra of nickel(II) complex  $[Ni(L^1)](PPh_3)DMF(1)$  of  $L^1H_2$ .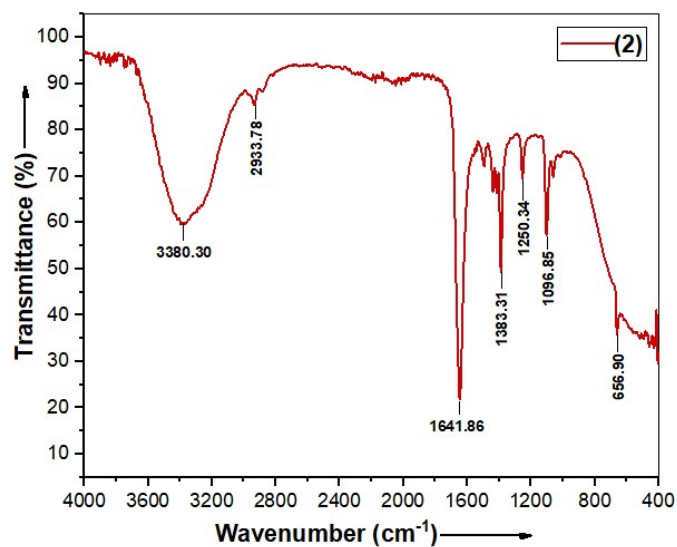Figure S4. FT-IR spectra of nickel (II) complex  $[Ni(L^2)](2)$  of  $L^2H_2$ .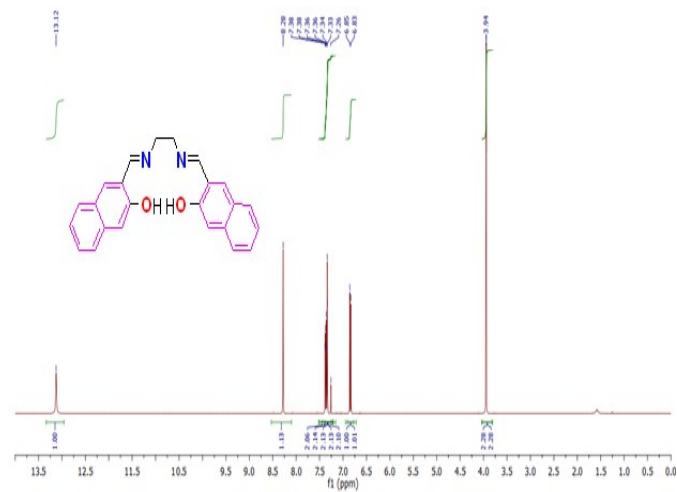Figure S5.  $^1H$ -NMR spectra of Schiff base ligand  $L^2H_2$ .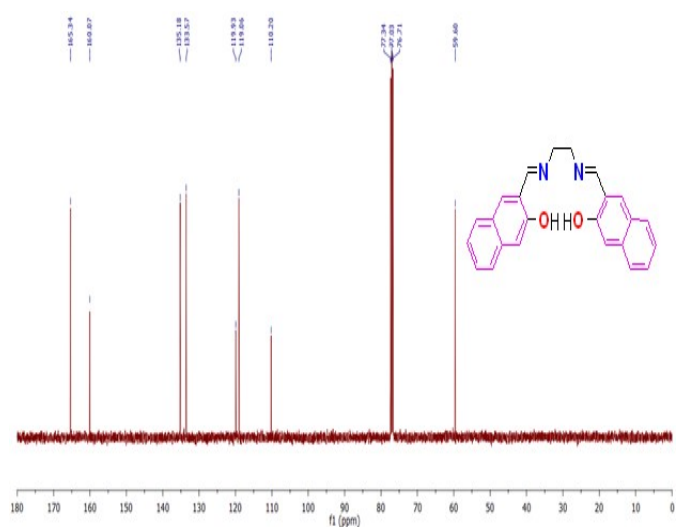

**Figure S6.**  $^{13}\text{C}$ -NMR spectra of Schiff base ligand  $\text{L}^2\text{H}_2$ .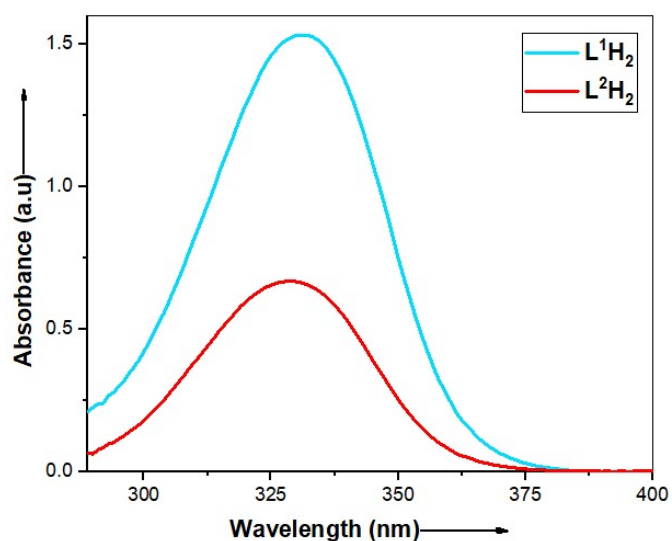**Figure S7.** UV-Vis spectrum of Schiff base ligands ( $\text{L}^1\text{H}_2$  and  $\text{L}^2\text{H}_2$ ) in DMSO ( $3 \times 10^{-3}$  M) solvent at room temperature.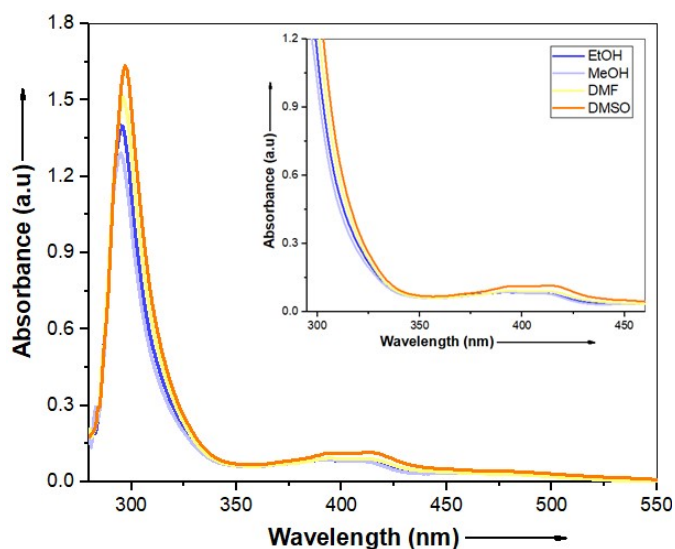**Figure S8.** UV-Vis spectrum of nickel (II) complex  $[\text{Ni}(\text{L}^1)](\text{PPh}_3)\text{DMF}$  (1) in different solvents ( $3 \times 10^{-3}$  M) at room temperature.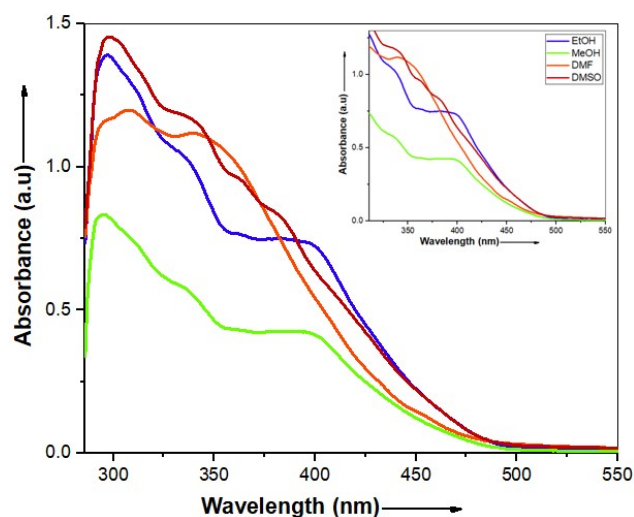**Figure S9.** UV-Vis spectrum of nickel (II) complex  $[\text{Ni}(\text{L}^2)]$  (2) in different solvents ( $3 \times 10^{-3}$  M) at room temperature.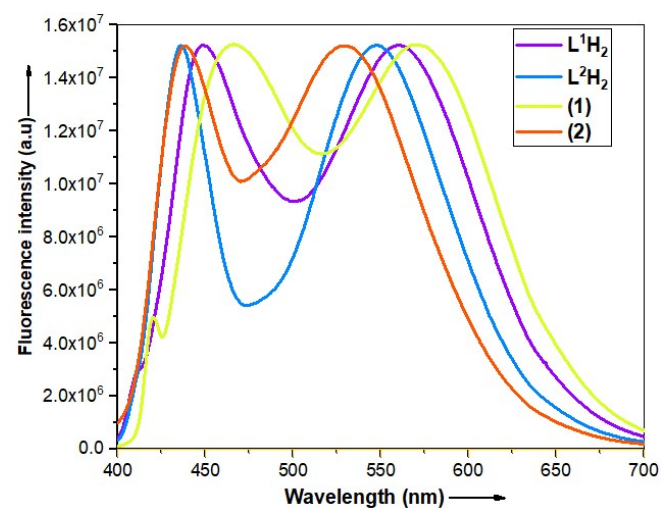**Figure S10.** Fluorescence spectra of Schiff base ligands ( $\text{L}^1\text{H}_2/\text{L}^2\text{H}_2$ ) and nickel complex  $[\text{Ni}(\text{L}^1)](\text{PPh}_3)\text{DMF}$  (1) and  $[\text{Ni}(\text{L}^2)]$  (2) in EtOH ( $3 \times 10^{-3}$  M) at room temperature.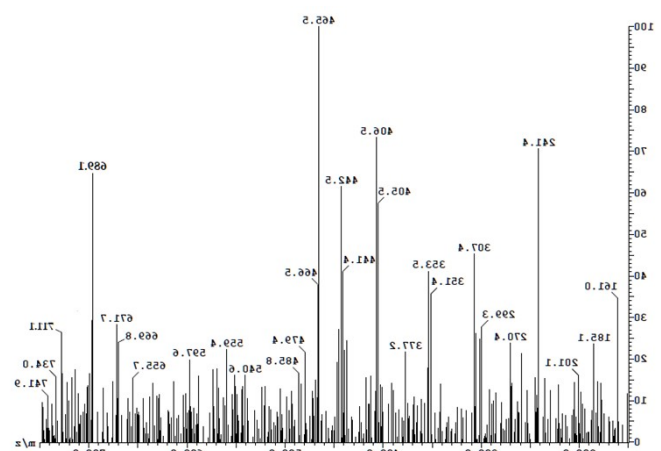**Figure S11.** LC-MS spectra of Ni(II) complex  $[\text{Ni}(\text{L}^1)](\text{PPh}_3)\text{DMF}$  (1).

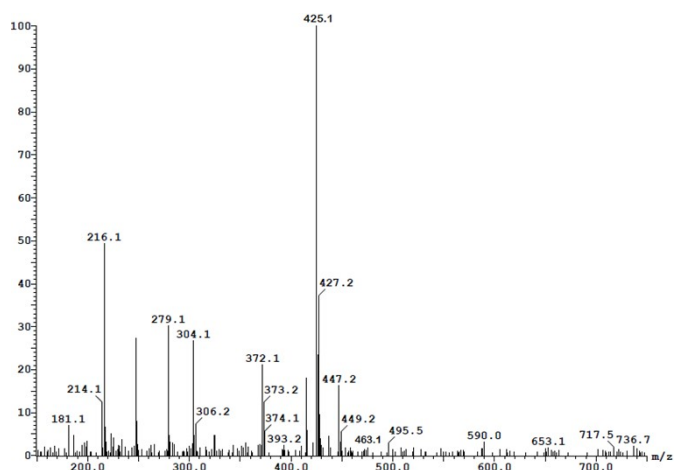

Figure S12. LC-MS spectra of Ni(II) complex  $[\text{Ni}(\text{L}^1)](2)$ .

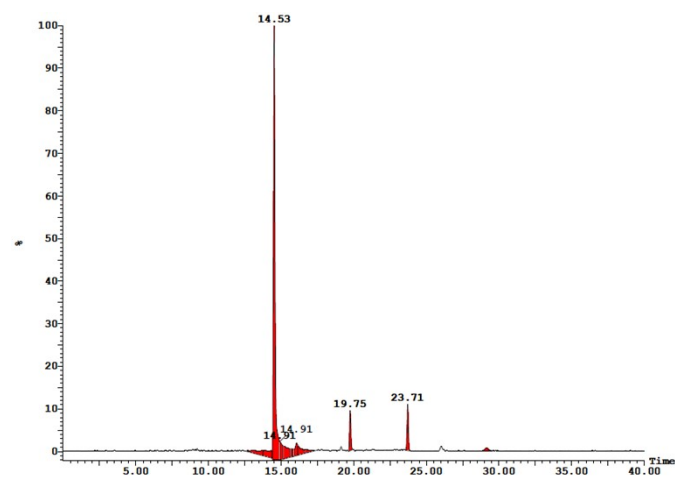

Figure S13. Retention peak of Ni(II) complex  $[\text{Ni}(\text{L}^1)](\text{PPh}_3)\text{DMF}(1)$ .

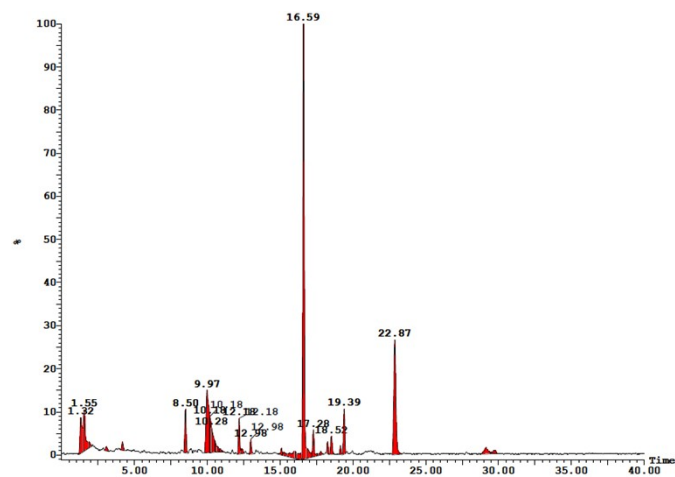

Figure S14. Retention peak of Ni(II) complex  $[\text{Ni}(\text{L}^1)](2)$ .

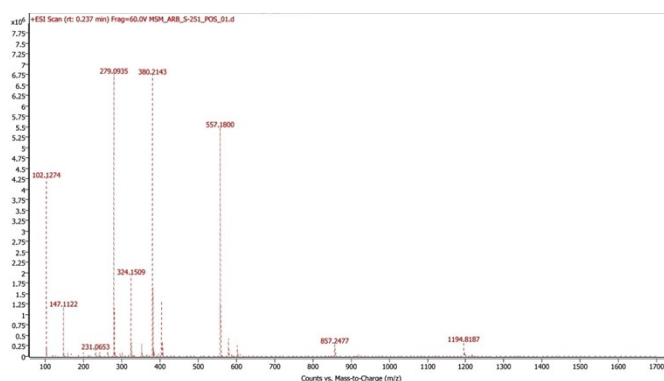

Figure S15. Mass spectra of Ni(II) complex  $[\text{Ni}(\text{L}^1)](\text{PPh}_3)\text{DMF}(1)$ .

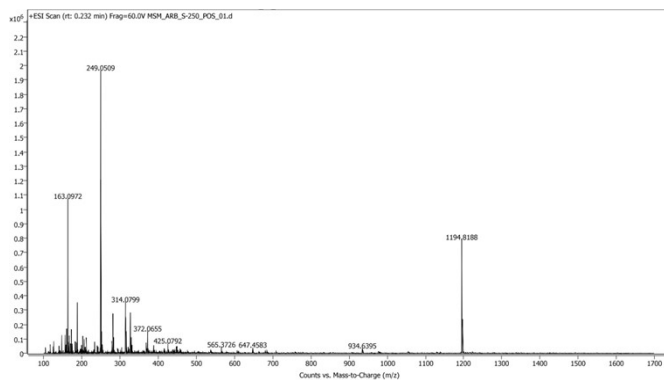

Figure S16. Mass spectra of Ni(II) complex  $[\text{Ni}(\text{L}^1)](2)$ .

#### Sample Chromatograms

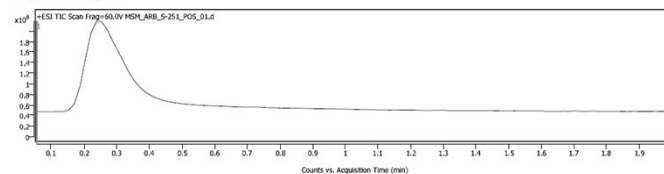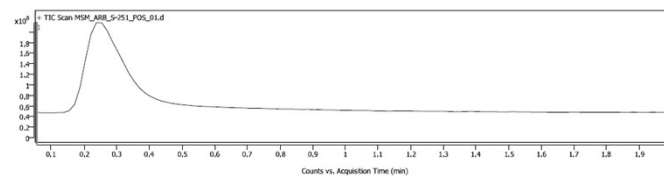

Figure S17. Scan rate of Ni(II) complex  $[\text{Ni}(\text{L}^1)](\text{PPh}_3)\text{DMF}(1)$ .

#### Sample Chromatograms

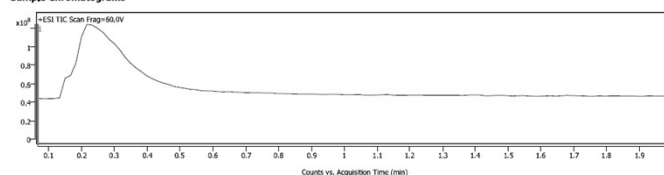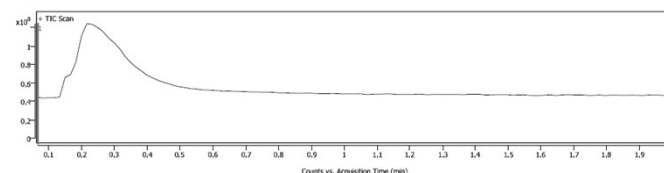

Figure S18. Scan rate of Ni(II) complex  $[\text{Ni}(\text{L}^1)](2)$ .

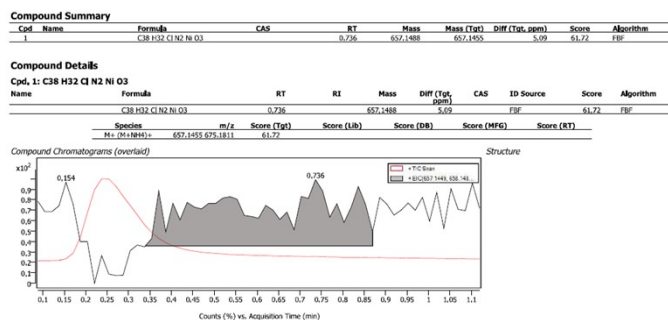

**Figure S19.** View of base peak chromatograms of Ni(II) complex  $[\text{Ni}(\text{L}^1)](\text{PPh}_3)\text{DMF}(1)$ .

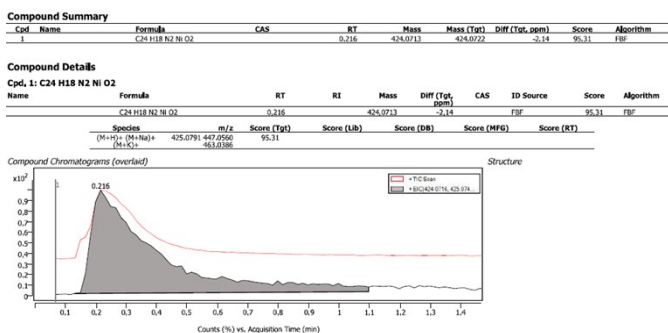

**Figure S20.** View of base peak chromatograms of Ni(II) complex  $[\text{Ni}(\text{L}^1)](2)$ .

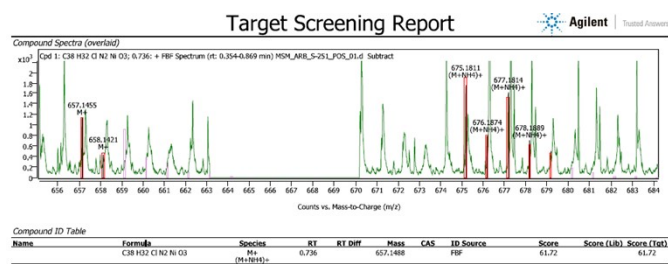

**Figure S21.** View of target screening report for Ni(II) complex  $[\text{Ni}(\text{L}^1)](\text{PPh}_3)\text{DMF}(1)$ .

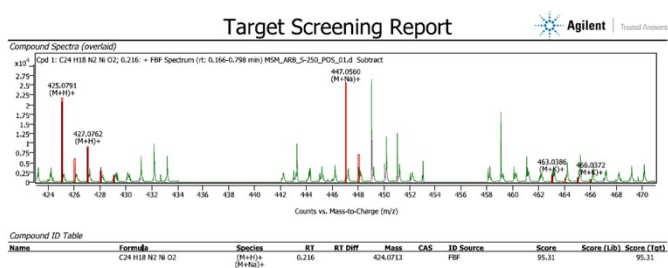

**Figure S22.** View of target screening report for Ni(II) complex  $[\text{Ni}(\text{L}^1)](2)$ .

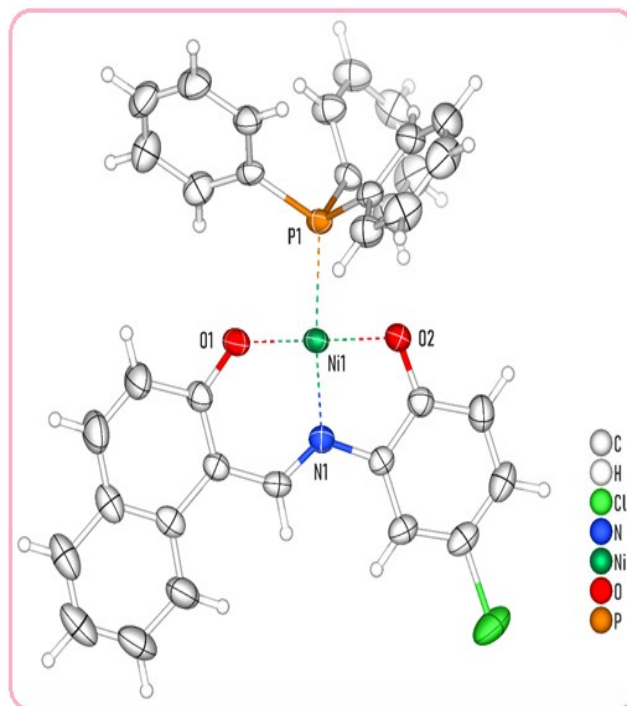

**Figure S23.** Shelf structure of the Ni(II) complex  $[\text{Ni}(\text{L}^1)(\text{PPh}_3)]\text{DMF}(1)$ .

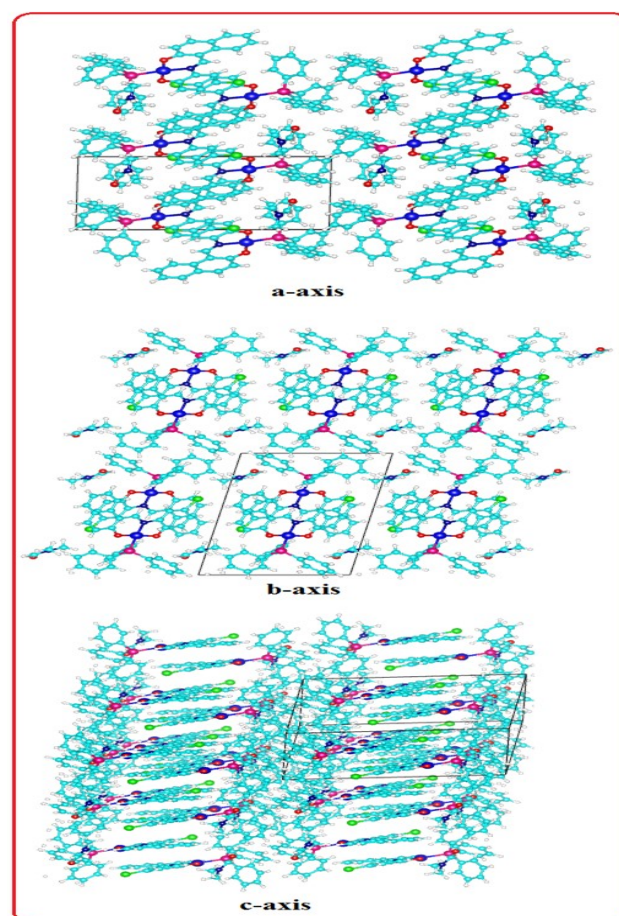

**Figure S24.** Packing view of Ni(II) complex  $[\text{Ni}(\text{L}^1)(\text{PPh}_3)]\text{DMF}(1)$  (along the  $a$ - $c$ -axis).

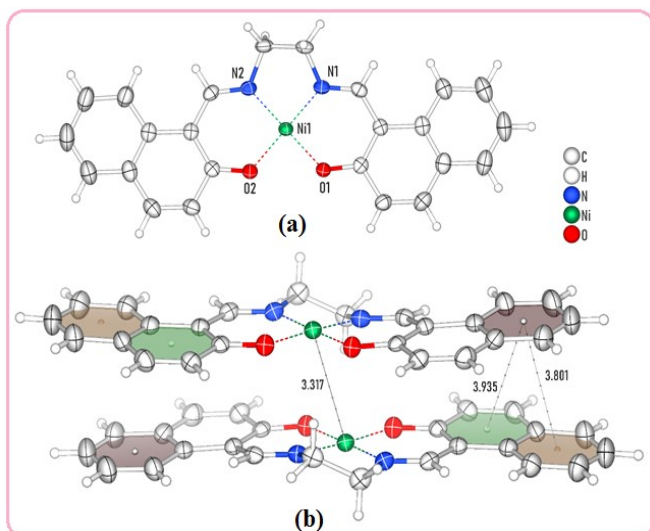

**Figure S25.** Shelx structure of the Ni(II) complex  $[\text{Ni}(\text{L}^2)](\mathbf{2})$  with (a) monomer and (b) dimer structure. The Ni...Ni separation is 3.317 Å in dimer Ni(II) complex ( $\mathbf{2}$ ).

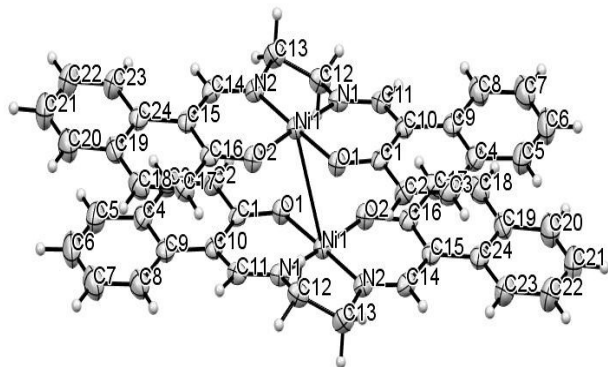

**Figure S26.** ORTEP representation of dimer Ni(II) complex  $[\text{Ni}(\text{L}^2)]_2(\mathbf{2})$ ; with thermal ellipsoids were drawn at 50% probability level.

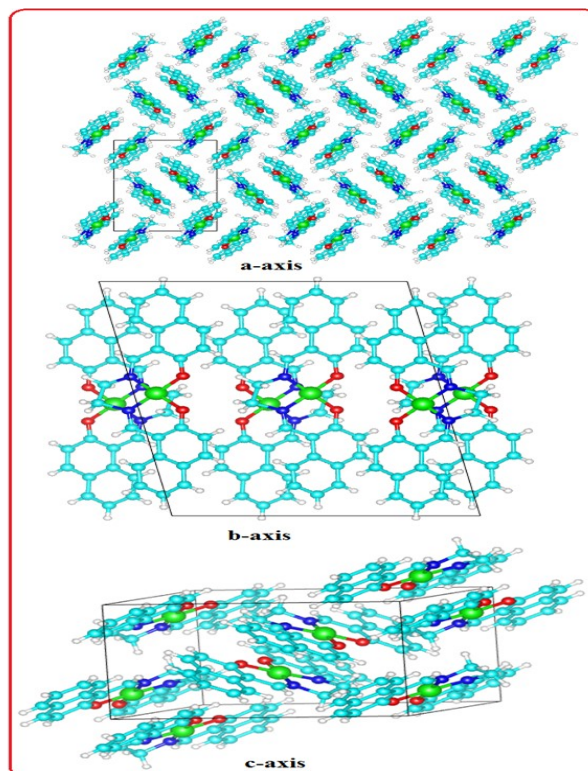

**Figure S27.** Packing view of the Ni(II) complex  $[\text{Ni}(\text{L}^2)](\mathbf{2})$  (along the  $a$ - $c$ -axis).

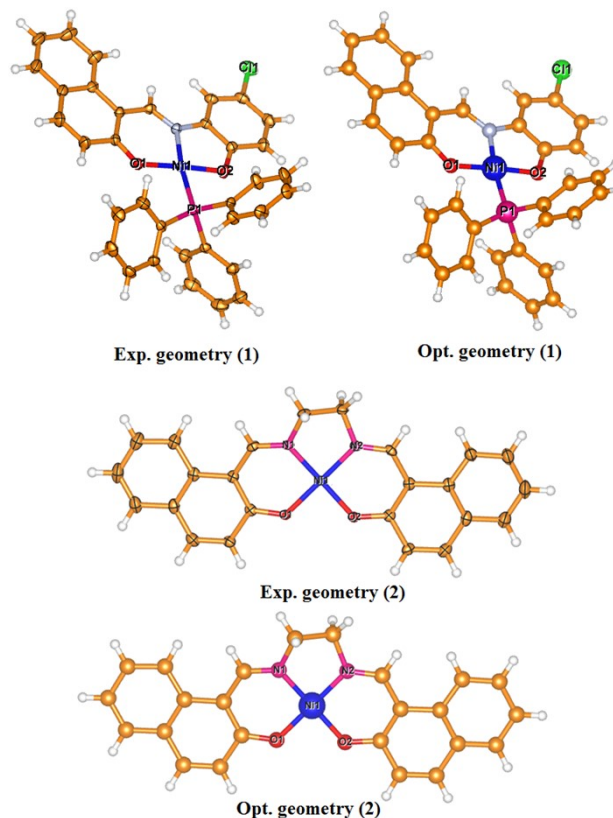

**Figure S28.** Optimized and experimental geometry of Ni(II) complex  $[\text{Ni}(\text{L}^1)](\text{PPh}_3)\text{DMF}(\mathbf{1})$  of  $\text{L}^1\text{H}_2$  and  $[\text{Ni}(\text{L}^2)](\mathbf{2})$  of  $\text{L}^2\text{H}_2$ .

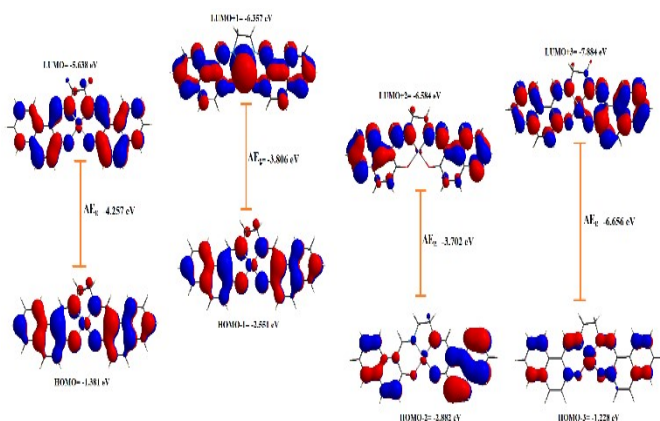

**Figure S29.** The atomic orbital composition of the frontier molecular orbitals of Ni(II) complex (2) of  $L^2H_2$ .

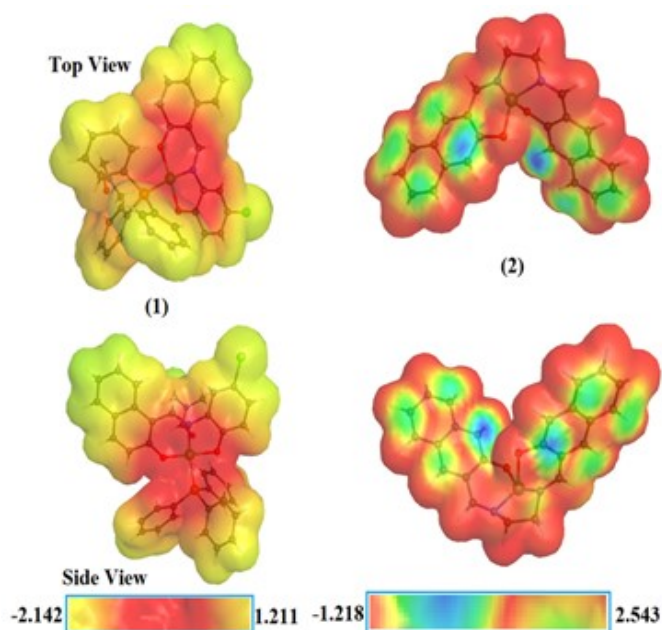

**Figure S30.** The molecular electrostatic potential maps (MEPs) of Ni(II) complex  $[Ni(L^1)](PPh_3)DMF(1)$  of  $L^1H_2$  and  $[Ni(L^2)](2)$  of  $L^2H_2$  with iso-value of 0.020 to 0.024 a.u., where negative potential decreases in order of red>orange>yellow>green>blue.

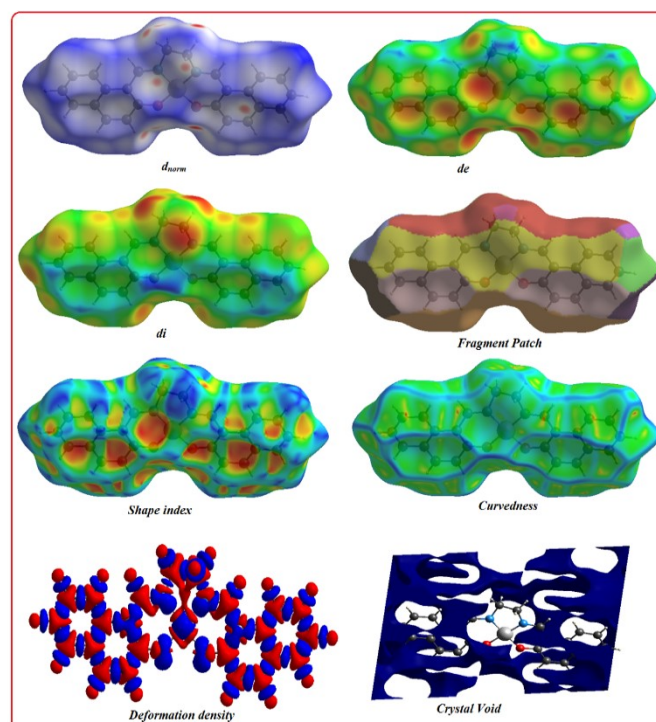

**Figure S31.** Graphical view of the Hirshfeld surfaces (HS) for Ni(II) complex  $[Ni(L^2)](2)$  mapped with  $d_{norm}$ ,  $d_i$ ,  $d_e$ , shape index, Fragment patch, curvedness, deformation density and crystal void; red spots represents the closest contacts and blue colour the most distant contacts for the Ni(II) complex (2).

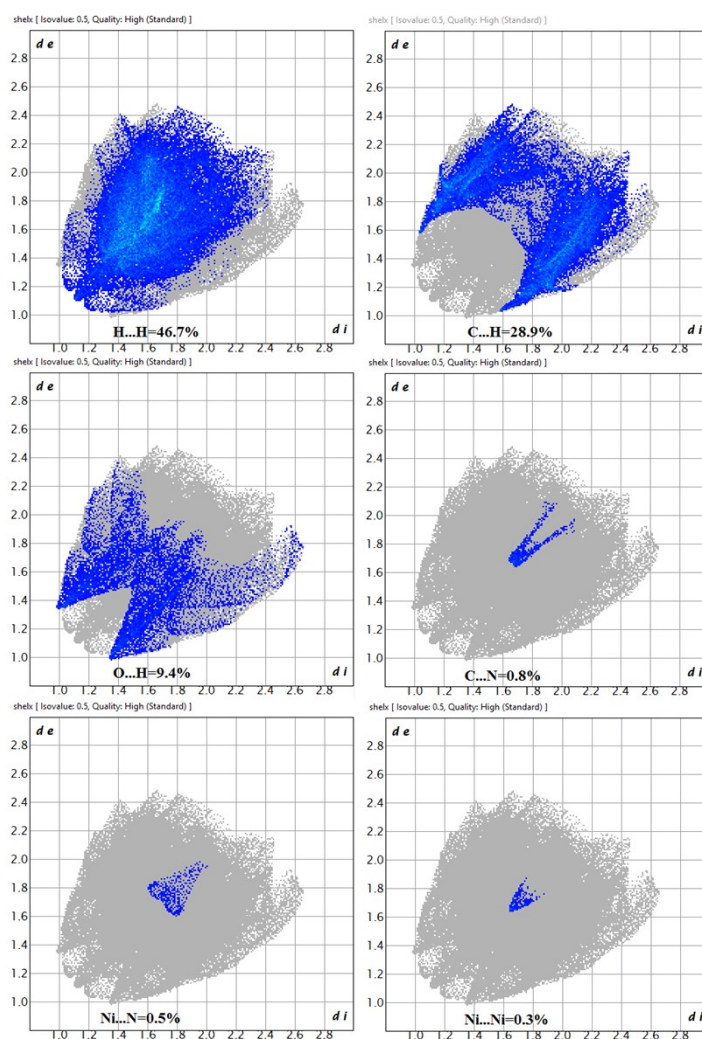

**Figure S32.** Graphical view with 2D Fingerplot plots of Ni(II) complex  $[\text{Ni}(\text{L}^2)](\mathbf{2})$  showing percentage of contacts contributed to the total Hirshfeld surface (HS) area of the molecules;  $d_i$  and  $d_e$  are the distances from the surface to the nearest atoms interior and exterior to the surface, respectively.

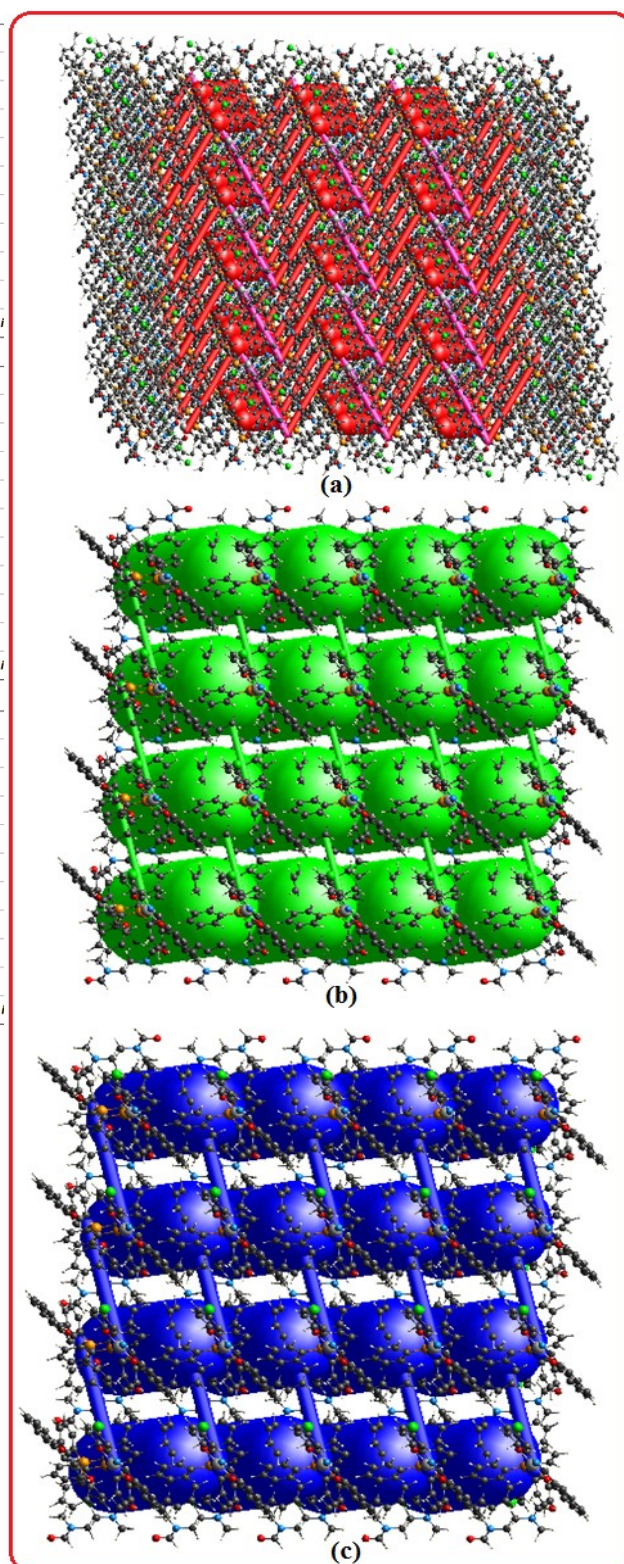

**Figure S33.** 3D graphical representation of energy framework diagrams for Ni(II) complex  $[\text{Ni}(\text{L}^2)](\mathbf{2})$ ; (a) Dispersion energy ( $E_{\text{dis}}$ ), (b) Coulomb energy ( $E_{\text{coul}}$ ), (c) Total energy ( $E_{\text{tot}}$ ) for cluster of molecule in Ni(II) complex  $(\mathbf{2})$ . Hydrogen atoms have been omitted for clarity and all diagrams used the same cylindrical scale of 300 for energies.



**Figure S34.** Computed CE-B3LYP estimates of energy components and total energies (kJ/mol) for the closest intermolecular interactions of Ni(II) complex [Ni(L<sup>1</sup>)](PPh<sub>3</sub>)DMF(1) and [Ni(L<sup>2</sup>)] (2).

### Complex (1)

|  | N | Symp              | R     | Electron Density | E_ele | E_pol | E_dis  | E_rep | E_tot  |
|--|---|-------------------|-------|------------------|-------|-------|--------|-------|--------|
|  | 2 | x, -y+1/2, z+1/2  | 18.00 | HF/3-21G         | 2.0   | -0.4  | -7.1   | 0.0   | -4.7   |
|  | 2 | x, y, z           | 17.87 | HF/3-21G         | -2.9  | -0.5  | -8.6   | 0.0   | -11.0  |
|  | 2 | -x, y+1/2, -z+1/2 | 17.34 | HF/3-21G         | -0.1  | -0.4  | -6.1   | 0.0   | -5.8   |
|  | 1 | -x, -y, -z        | 18.43 | HF/3-21G         | 1.6   | -0.1  | -1.0   | 0.0   | 0.6    |
|  | 2 | -x, y+1/2, -z+1/2 | 6.12  | HF/3-21G         | -8.0  | -5.5  | -46.6  | 17.0  | -40.0  |
|  | 2 | x, -y+1/2, z+1/2  | 6.70  | HF/3-21G         | -25.6 | -11.8 | -43.2  | 28.9  | -49.3  |
|  | 1 | -x, -y, -z        | 3.52  | HF/3-21G         | -45.6 | -30.0 | -163.5 | 98.6  | -133.3 |
|  | 2 | -x, y+1/2, -z+1/2 | 9.62  | HF/3-21G         | 2.7   | -0.9  | -3.8   | 0.0   | -1.2   |
|  | 1 | -x, -y, -z        | 6.00  | HF/3-21G         | -28.9 | -8.9  | -60.2  | 28.2  | -66.5  |
|  | 1 | -x, -y, -z        | 18.64 | HF/3-21G         | -0.6  | -0.2  | -4.7   | 0.0   | -4.9   |

| Energy Model                                     | k_ele | k_pol | k_disp | k_rep |
|--------------------------------------------------|-------|-------|--------|-------|
| CE-HF ... HF/3-21G electron densities            | 1.019 | 0.651 | 0.901  | 0.811 |
| CE-B3LYP ... B3LYP/6-31G(d,p) electron densities | 1.057 | 0.740 | 0.871  | 0.618 |

### Complex (2)

|  | N | Symp              | R     | Electron Density | E_ele | E_pol | E_dis  | E_rep | E_tot  |
|--|---|-------------------|-------|------------------|-------|-------|--------|-------|--------|
|  | 1 | -x, -y, -z        | 18.45 | HF/3-21G         | 0.7   | -0.2  | -5.0   | 0.0   | -3.9   |
|  | 2 | x, -y+1/2, z+1/2  | 17.81 | HF/3-21G         | 0.2   | -0.4  | -7.7   | 0.0   | -7.0   |
|  | 2 | x, y, z           | 17.69 | HF/3-21G         | -0.1  | -0.5  | -9.3   | 0.0   | -8.9   |
|  | 2 | -x, y+1/2, -z+1/2 | 6.06  | HF/3-21G         | -8.7  | -5.5  | -50.0  | 20.0  | -41.4  |
|  | 1 | -x, -y, -z        | 3.48  | HF/3-21G         | -51.6 | -31.1 | -173.6 | 111.7 | -138.7 |
|  | 2 | x, -y+1/2, z+1/2  | 6.63  | HF/3-21G         | -26.8 | -12.2 | -46.1  | 33.3  | -49.7  |
|  | 2 | -x, y+1/2, -z+1/2 | 9.51  | HF/3-21G         | 2.8   | -1.0  | -4.0   | 0.0   | -1.4   |
|  | 2 | -x, y+1/2, -z+1/2 | 17.16 | HF/3-21G         | 1.3   | -0.4  | -6.6   | 0.0   | -4.9   |
|  | 1 | -x, -y, -z        | 5.93  | HF/3-21G         | -29.8 | -9.3  | -64.5  | 33.0  | -67.8  |
|  | 1 | -x, -y, -z        | 18.24 | HF/3-21G         | 2.0   | -0.1  | -1.1   | 0.0   | 1.0    |

| Energy Model                                     | k_ele | k_pol | k_disp | k_rep |
|--------------------------------------------------|-------|-------|--------|-------|
| CE-HF ... HF/3-21G electron densities            | 1.019 | 0.651 | 0.901  | 0.811 |
| CE-B3LYP ... B3LYP/6-31G(d,p) electron densities | 1.057 | 0.740 | 0.871  | 0.618 |

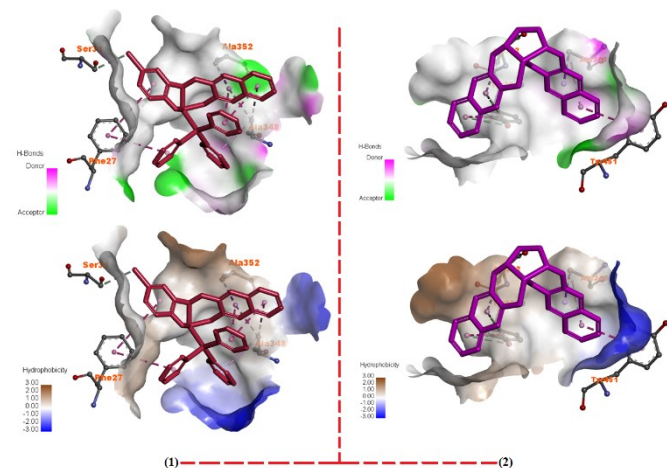

**Figure S35.** H-bond (top view) and hydrophobicity (bottom view) plot of interacting amino acid residues of SARS-CoV-2 spike protein (PDB ID: 7CWO) with the Ni(II) complex (1) and (2). The complexes are displayed in red and pink colour.

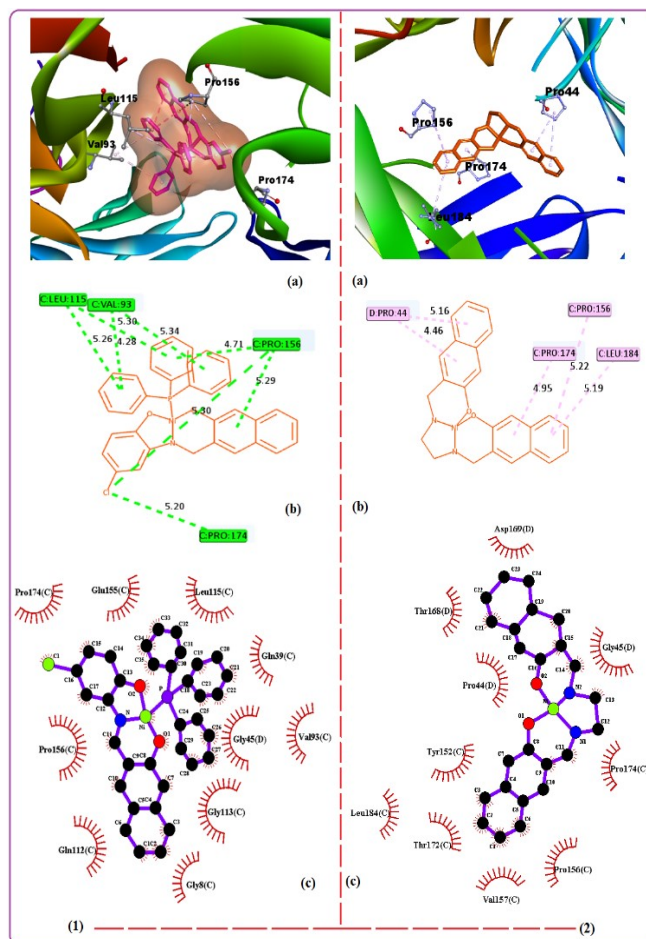

**Figure S36.** View of docked Ni(II) complex (1) and (2) with the binding cavity of the spike protein interaction of SARS-CoV-2 Omicron variant (PDB ID: 7WK8). The 2D interaction plot and Lig-Plot interaction of docked complexes with focussed for interacting different amino acid residues.

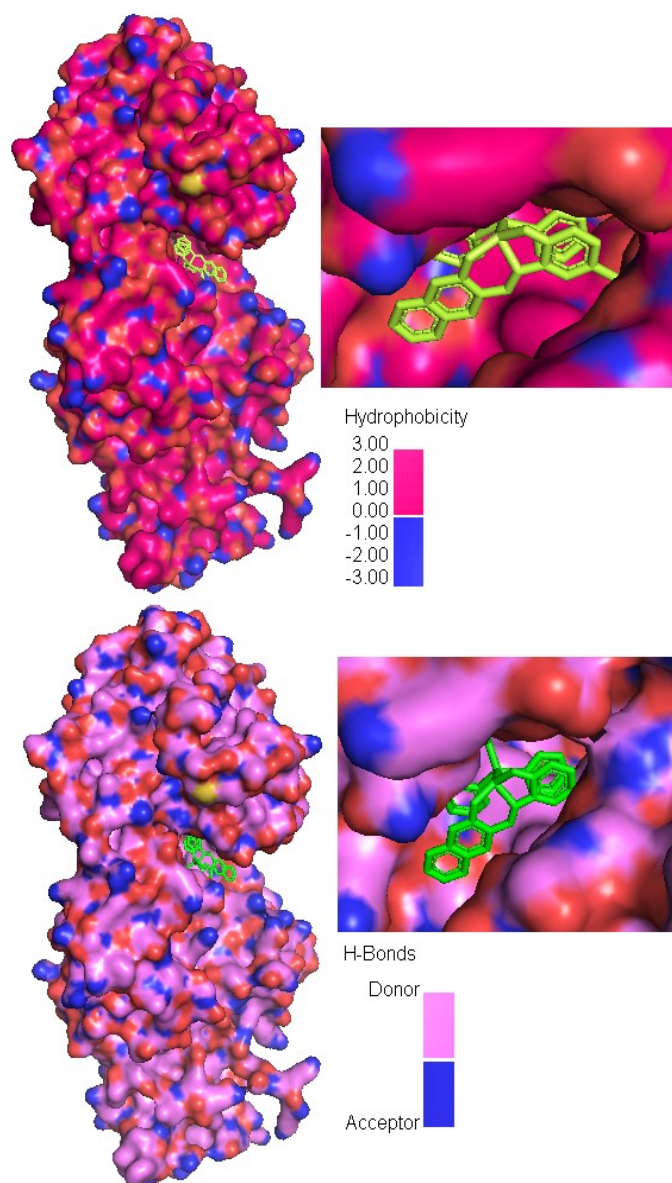

**Figure S37.** View of the total density surfaces representation for docked Ni(II) complex (1) inside the SARS-CoV-2 Omicron spike protein (PDB ID: 7WK8); hydrophobic pocket represented with deep pink and blue colours; hydrogen bond donor and acceptor meshes represented by light pink and dark navy blue colours, respectively.

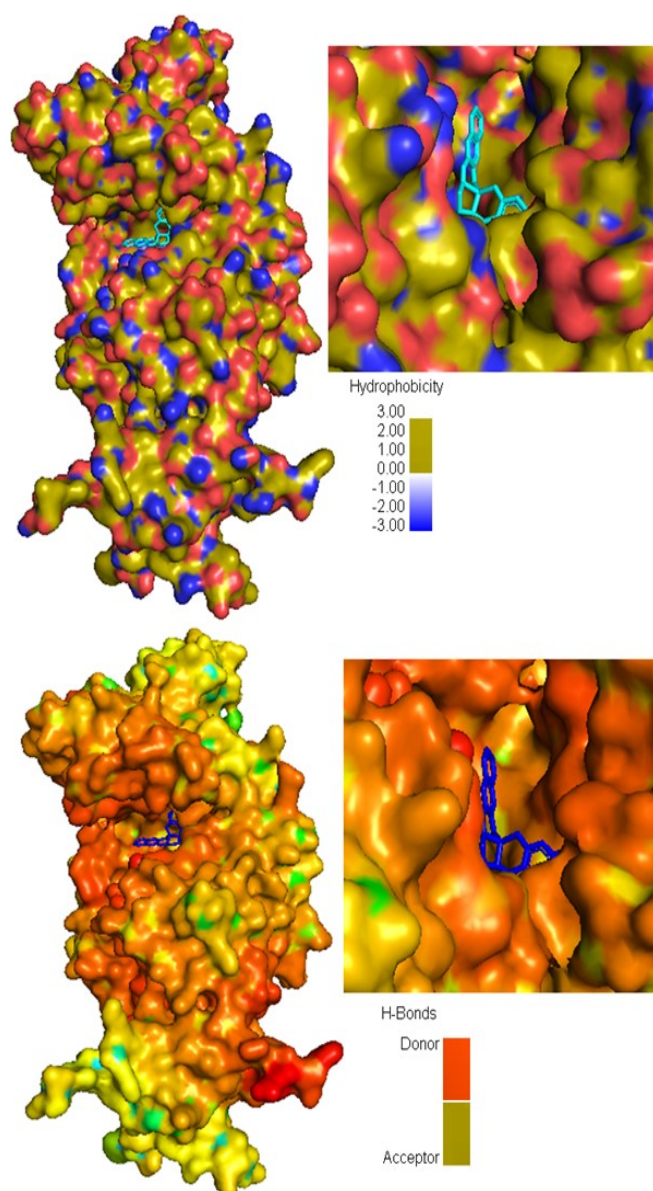

**Figure S38.** View of the total density surfaces representation for docked Ni(II) complex (2) inside the SARS-CoV-2 Omicron spike protein (PDB ID: 7WK8), hydrophobic pocket represented with deep yellow and blue colours; hydrogen bond donor and acceptor meshes represented by orange and light yellow colours, respectively.

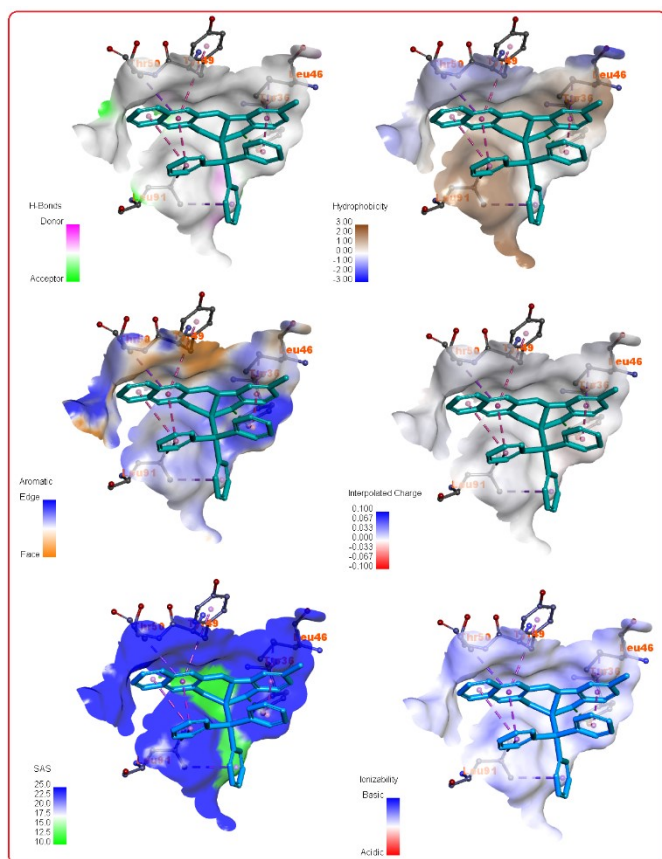

**Figure S39.** Graphical representation of docked Ni (II) complex (1) inside the SARS-CoV-2 Omicron spike protein (PDB ID: 7QTK) with its focused view for interacting residues along with H-bond and intermolecular interactions; (a) H-bond donor and acceptor meshes represented by pink and light green colours, respectively; (b) Hydrophobic pocket represented with blue and brown colours; (c) Aromatic receptor surface represented by blue (Edge) and light orange (face) colours; (d) interpolated charge receptor surface represented by blue and red colours; (e) SAS receptor surface represented by blue and light green colours, respectively; (f) ionizability receptor surface represented by blue (basic) and red (acidic) colours.

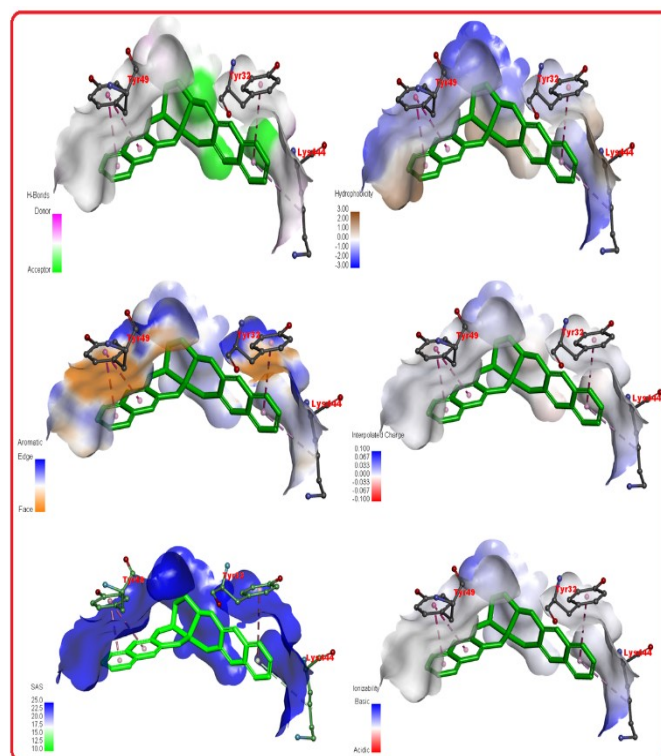

**Figure S40.** Graphical representation of docked Ni (II) complex (2) inside the SARS-CoV-2 Omicron spike protein (PDB ID: 7QTK) with its focused view for interacting residues along with H-bond and intermolecular interactions; (a) H-bond donor and acceptor meshes represented by pink and light green colours, respectively; (b) Hydrophobic pocket represented with blue and brown colours; (c) Aromatic receptor surface represented by blue (Edge) and light orange (face) colours; (d) interpolated charge receptor surface represented by blue and red colours; (e) SAS receptor surface represented by blue and light green colours, respectively; (f) ionizability receptor surface represented by blue (basic) and red (acidic) colours.

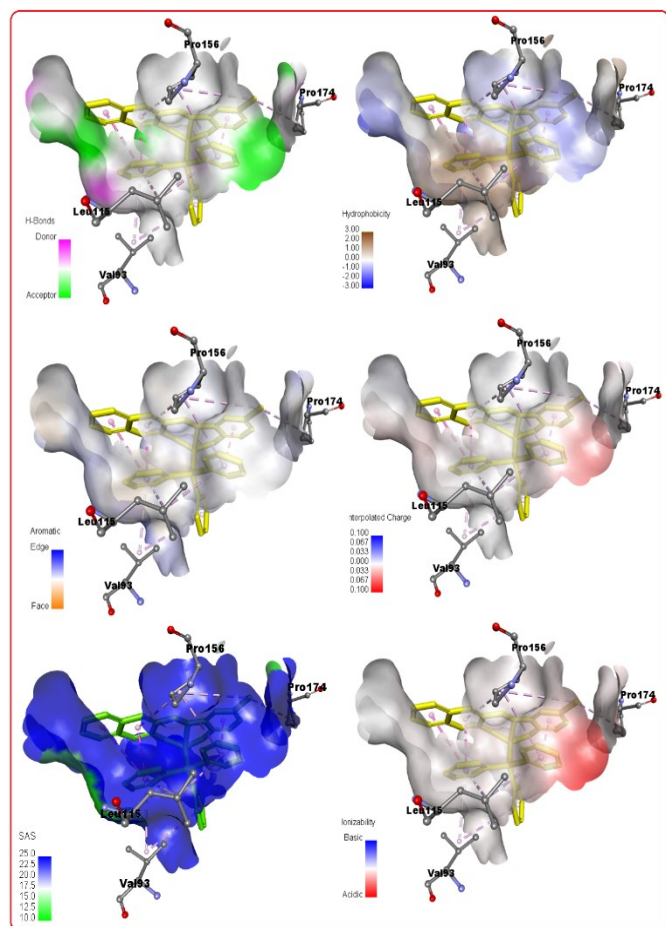

**Figure S41.** Graphical representation of docked Ni (II) complex (1) inside the SARS-CoV-2 Omicron spike protein (PDB ID: 7WK8) with its focused view for interacting residues along with H-bond and intermolecular interactions; (a) H-bond donor and acceptor meshes represented by pink and light green colours, respectively; (b) Hydrophobic pocket represented with blue and brown colours; (c) Aromatic receptor surface represented by blue (Edge) and light orange (face) colours; (d) interpolated charge receptor surface represented by blue and red colours; (e) SAS receptor surface represented by blue and light green colours, respectively; (f) ionizability receptor surface represented by blue (basic) and red (acidic) colours.

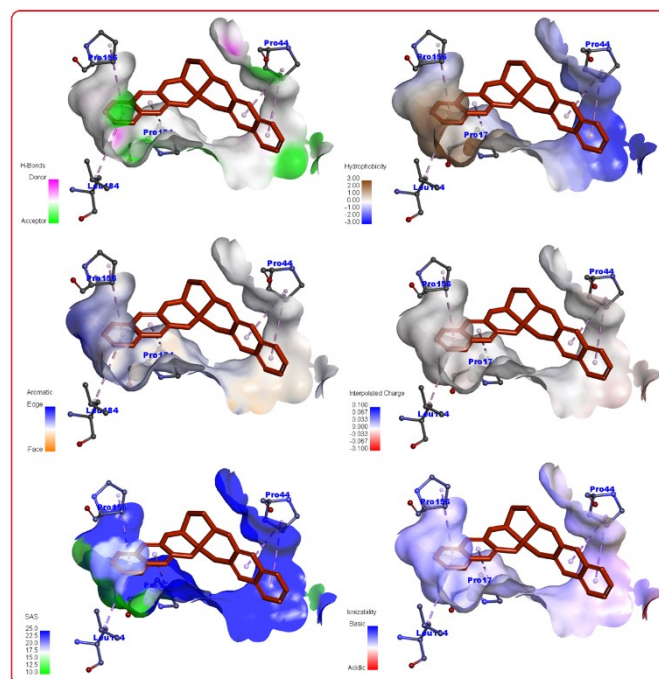

**Figure S42.** Graphical representation of docked Ni (II) complex (2) inside the SARS-CoV-2 Omicron spike protein (PDB ID: 7WK8) with its focused view for interacting residues along with H-bond and intermolecular interactions; (a) H-bond donor and acceptor meshes represented by pink and light green colours, respectively; (b) Hydrophobic pocket represented with blue and brown colours; (c) Aromatic receptor surface represented by blue (Edge) and light orange (face) colours; (d) interpolated charge receptor surface represented by blue and red colours; (e) SAS receptor surface represented by blue and light green colours, respectively; (f) ionizability receptor surface represented by blue (basic) and red (acidic) colours.

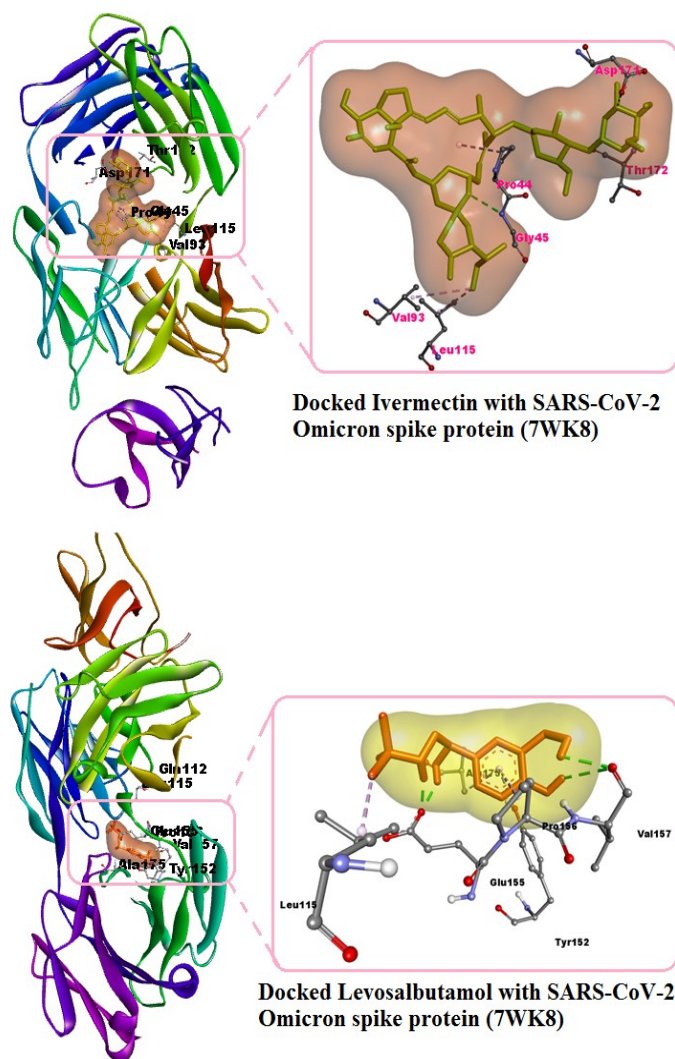

**Figure S43.** Graphical view of the docked ivermectin (IVM) and levosalbutamol (LVM) inside the active site of the SARS-CoV-2 Omicron spike protein (PDB ID: 7WK8) with its focussed view for interacting amino acid residues.

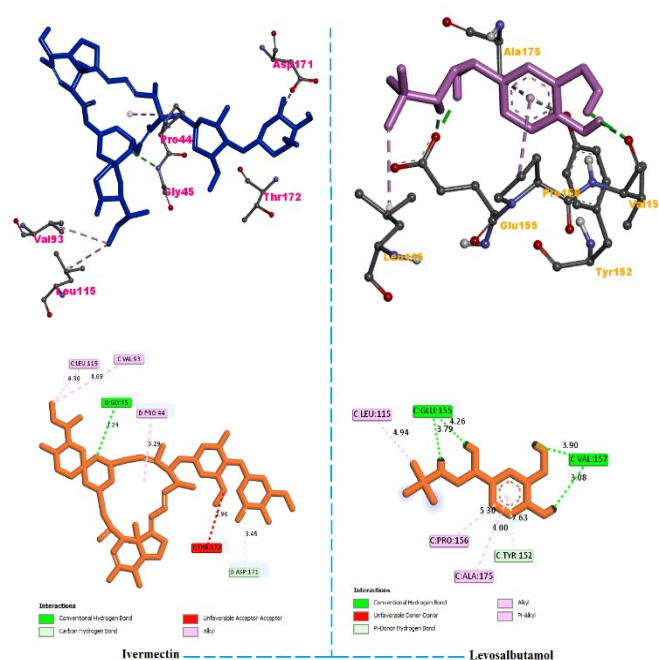

**Figure S44.** The top figures show 3D view of ivermectin (IVM) and levosalbutamol (LVM) with interacting residues inside the active site of the SARS-CoV-2 Omicron spike protein (PDB ID: 7WK8). The bottom figures show the 2D representation of docked ivermectin (IVM) and levosalbutamol (LVM) with types of interactions.

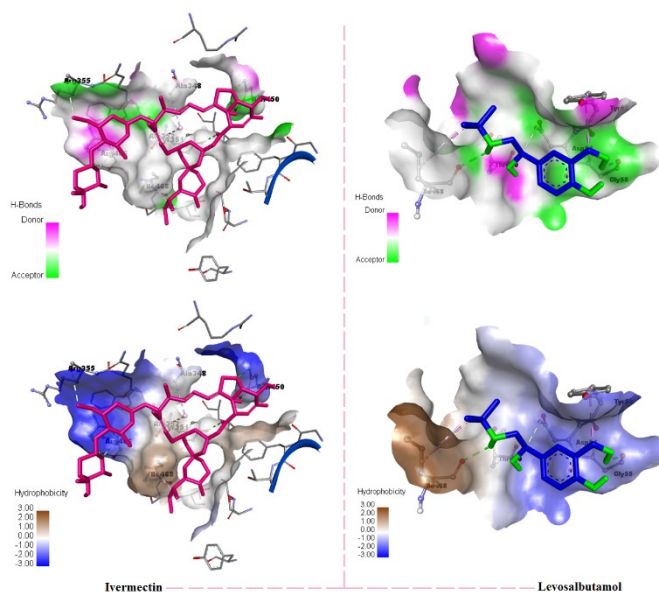

**Figure S45.** H-bond (top view) and hydrophobicity (bottom view) plot of interacting amino acid residues of SARS-CoV-2 spike protein (PDB ID: 7CWO) with the docked ivermectin (IVM) and levosalbutamol (LVM). Ivermectin (IVM) and levosalbutamol are displayed in pink and blue colour.

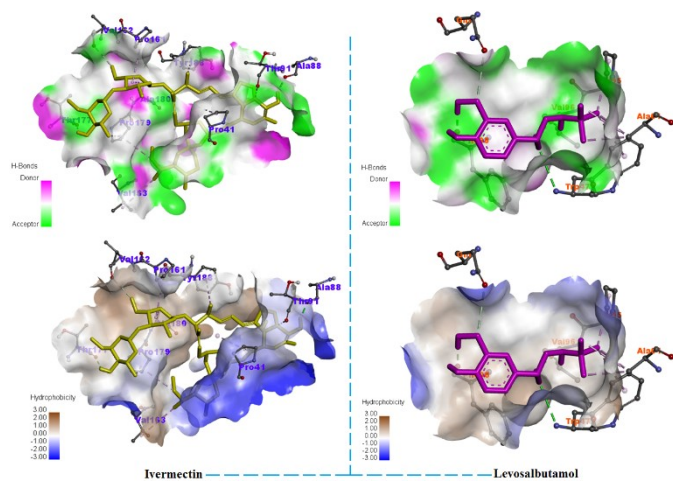

**Figure S46.** H-bond (top view) and hydrophobicity (bottom view) plot of interacting amino acid residues of SARS-CoV-2 Omicron spike protein (PDB ID: 7QTK) with the docked ivermectin (IVM) and levosalbutamol (LVM). Ivermectin (IVM) and levosalbutamol are displayed in yellow and pink colour.

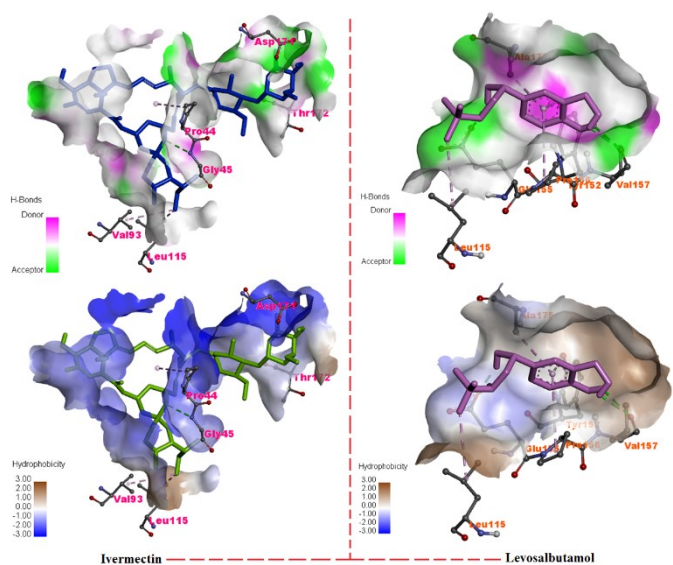

**Figure S47.** H-bond (top view) and hydrophobicity (bottom view) plot of interacting amino acid residues of SARS-CoV-2 Omicron spike protein (PDB ID: 7WK8) with the docked ivermectin (IVM) and levosalbutamol (LVM). Ivermectin (IVM) and levosalbutamol are displayed in blue/ purple colour and green/purple colour.

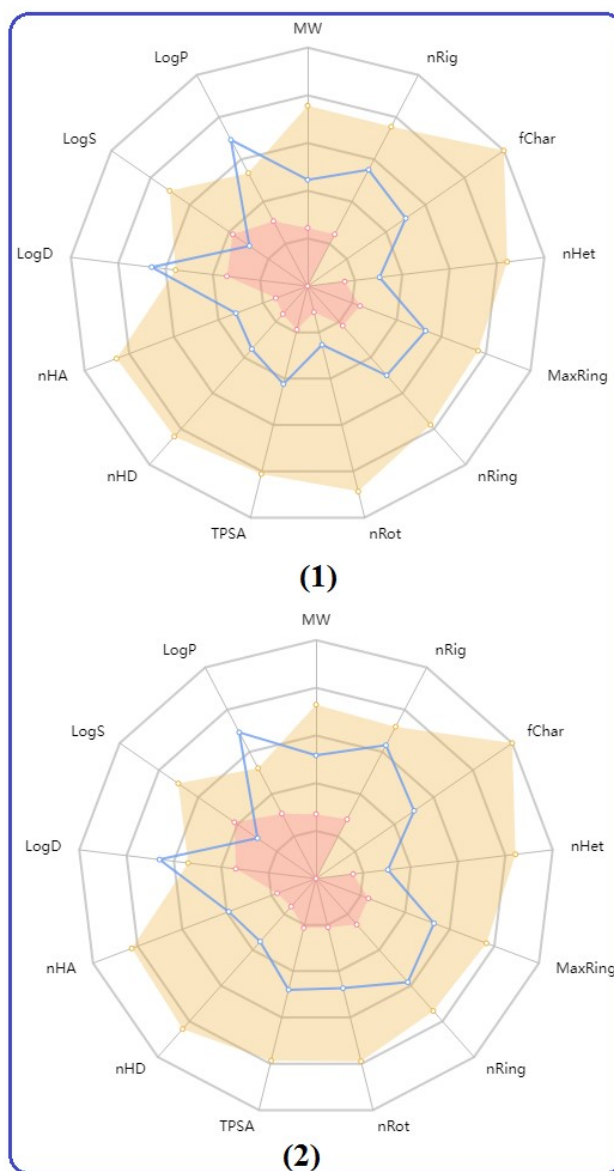

**Figure S48.** ADMET representation of new Schiff base Ni(II) complex (1) and (2).

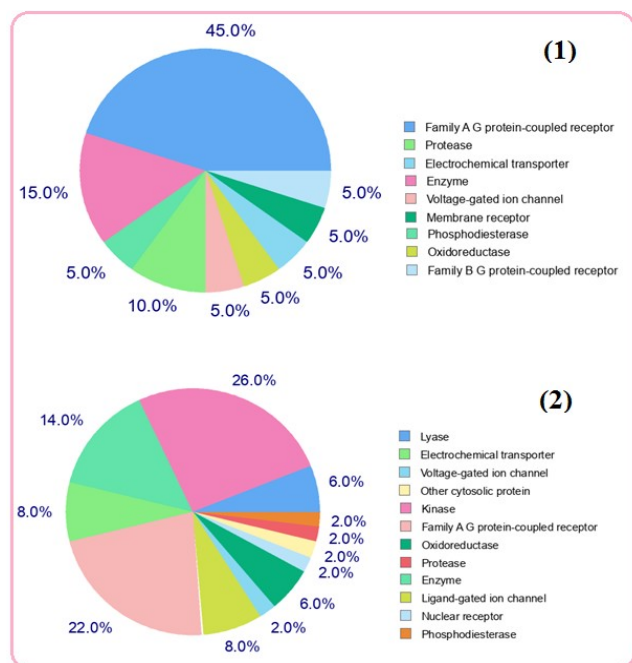

**Figure S49.** Pie chart representation of Swiss-target prediction for new Schiff base Ni(II) complex (1) and (2).

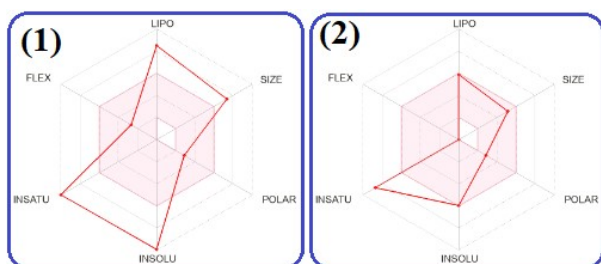

**Figure S50.** Graphical representation of bioavailability radar for new Schiff base Ni(II) complex (1) and (2).

**Table S1.** AUTODOCK parameters (docking coordinates, grid size and grid spacing) used for ivermectin (IVM) and levosalbutamol (LVM) docked with S protein from SARS CoV-2 Spike protein and the Omicron S proteins.

| Autodock parameters           | SARS-CoV-2 Spike protein |                         | Omicron S proteins     |                        |                        |                        |
|-------------------------------|--------------------------|-------------------------|------------------------|------------------------|------------------------|------------------------|
|                               | (PDB ID:7CWO)            |                         | (PDB ID: 7QTK)         |                        | (PDB ID: 7WK8)         |                        |
|                               | IVM                      | LVM                     | IVM                    | LVM                    | IVM                    | LVM                    |
| Docking coordinates (x, y, z) | 65.828, 96.754, 83.245   | 67.703, 98.629, 85.120  | 90.121, 91.541, 91.147 | 80.231, 79.562, 83.762 | 82.232, 86.624, 89.258 | 83.752, 86.358, 90.712 |
| Grid Size (x, y, z)           | 80.828, 111.754, 8.245   | 80.828, 111.754, 98.245 | 92.141, 89.234, 93.527 | 87.236, 88.231, 87.539 | 79.612, 73.322, 82.815 | 81.950, 87.478, 85.421 |
| Grid spacing                  | 0.375 Å                  | 0.375 Å                 | 0.492 Å                | 0.492 Å                | 0.442 Å                | 0.442 Å                |

**Table S2.** The relevant parameters obtained from AUTODOCK outputs for ivermectin(IVM) and levosalbutamol (LVM) with SARS-CoV-2 Spike protein (PDB ID: 7CWO) and the Omicron S proteins (PDB ID: 7CQTK and 7WK8).

| Property                               | SARS-CoV-2 Spike protein |       | Omicron S proteins |       |                |       |
|----------------------------------------|--------------------------|-------|--------------------|-------|----------------|-------|
|                                        | (PDB ID:7CWO)            |       | (PDB ID: 7QTK)     |       | (PDB ID: 7WK8) |       |
|                                        | IVM                      | LVM   | IVM                | LVM   | IVM            | LVM   |
| Binding energy (kcal/mol)              | -9.04                    | -5.70 | -8.93              | -5.68 | -10.14         | -5.80 |
| Ligand efficiency                      | -0.15                    | -0.34 | -0.14              | -0.27 | -0.16          | -0.27 |
| Inhibition constant (nM)               | 234.91                   | 66.56 | 284.61             | 65.87 | 36.89          | 58.22 |
| Intermolecular Energy (kcal/mol)       | -12.32                   | -8.08 | -12.21             | -8.09 | -13.42         | -8.16 |
| Electrostatic energy (kcal/mol)        | -0.57                    | -0.31 | 0.03               | -0.78 | -0.16          | -1.15 |
| Torsional energy (kcal/mol)            | 3.28                     | 2.39  | 3.28               | 2.37  | 3.25           | 2.39  |
| vdW + Hbond + desolv Energy (kcal/mol) | -11.76                   | -7.78 | -12.24             | -7.31 | -13.26         | -7.01 |
| Unbound Energy (kcal/mol)              | -2.80                    | -1.95 | -3.09              | -2.02 | 2.63           | -2.06 |
| Total energy (kcal/mol)                | -2.80                    | -1.95 | -3.09              | -2.02 | -2.63          | -2.06 |

**Table S3.** Pharmacokinetic Properties of the newly synthesized Ni(II) complex (1) and (2).

| Property     | Model Name                                                        | Predicted Value |         |
|--------------|-------------------------------------------------------------------|-----------------|---------|
|              |                                                                   | (1)             | (2)     |
| Absorption   | Water solubility(log mol/L)                                       | -9.942          | -6.12   |
|              | Caco <sub>2</sub> permeability(log Papp in 10 <sup>-6</sup> cm/s) | -4.923          | -4.387  |
|              | Intestinal absorption (human) (%Absorbed)                         | 85.919          | 81.246  |
|              | Skin Permeability(Log Kp)                                         | -4.715          | -3.221  |
|              | P-glycoprotein Substrate                                          | Yes             | Yes     |
|              | P-glycoprotein I inhibitor                                        | Yes             | Yes     |
| Distribution | P-glycoprotein II inhibitor                                       | Yes             | Yes     |
|              | VDss (human) (log L/kg)                                           | 0.741           | 1.189   |
|              | Fraction unbound (human) (Fu)                                     | 0.665           | 0.809   |
|              | BBB permeability(log BB)                                          | -2.618          | -0.1488 |
| Metabolism   | CNS permeability(log PS)                                          | -0.629          | -1.248  |
|              | CYP2D6 substrate                                                  | No              | No      |
|              | CYP3A4 substrate                                                  | No              | Yes     |

|           |                                                      |        |        |
|-----------|------------------------------------------------------|--------|--------|
|           | CYP1A2 substrate                                     | Yes    | Yes    |
|           | CYP2C19 inhibitor                                    | No     | Yes    |
|           | CYP2C9 inhibitor                                     | No     | Yes    |
|           | CYP2D6 inhibitor                                     | No     | No     |
|           | CYP3A4 inhibitor                                     | No     | No     |
| Excretion | Total Clearance (log ml/min/kg)                      | -2.551 | -0.982 |
|           | Renal OCT2 substrate                                 | No     | No     |
| Toxicity  | AMES toxicity                                        | No     | No     |
|           | Max. tolerated dose (human) (log mg/kg/day)          | 0.629  | 0.547  |
|           | hERG I inhibitor                                     | No     | No     |
|           | hERG II inhibitor                                    | Yes    | Yes    |
|           | Oral Rat Acute Toxicity (LD50) (mol/kg)              | 8.247  | 5.084  |
|           | Oral Rat Chronic Toxicity (LOAEL) (log mg/kg_bw/day) | -1.758 | -2.361 |
|           | Hepatotoxicity                                       | Yes    | Yes    |
|           | Skin Sensation                                       | No     | No     |
|           | T. Pyriformis toxicity(log ug/L)                     | 0.358  | 1.247  |
|           | Minnow toxicity(log Mm)                              | -7.441 | -6.714 |

|                 |        |        |
|-----------------|--------|--------|
| nviolations     | 2      | 0      |
| nrotb           | 4      | 0      |
| volume          | 515.44 | 354.62 |
| LogP            | 10.820 | 5.366  |
| Rotatable Bonds | 4      | 0      |
| Acceptors       | 2      | 2      |
| Donors          | 0      | 0      |
| Surface area    | 44.41  | 43.18  |

**Table S4.** Chemoinformatics Properties of the newly synthesized Ni(II) complex (1) and (2).

| Model Name               | Predicted Value        |                        |
|--------------------------|------------------------|------------------------|
|                          | (1)                    | (2)                    |
| Molecular Formula        | $C_{35}H_{25}ClNiO_2P$ | $C_{24}H_{18}N_2NiO_2$ |
| Molecular Weight (g/mol) | 616.71                 | 425.11                 |
| GPCR ligand              | -0.06                  | -0.02                  |
| Ion channel modulator    | -0.38                  | -0.16                  |
| Kinase inhibitor         | -0.07                  | -0.02                  |
| Nuclear receptor ligand  | -0.15                  | -0.04                  |
| Protease inhibitor       | -0.04                  | -0.05                  |
| Enzyme inhibitor         | -0.14                  | -0.03                  |
| miLogP                   | 7.58                   | 4.52                   |
| TPSA                     | 32.40                  | 30.33                  |
| natoms                   | 41                     | 29                     |
| nON                      | 3                      | 4                      |
| nOHNH                    | 0                      | 0                      |
